## How yeast cells find their mates

Nicholas T. Henderson, Manuella R. Clark-Cotton, Trevin R. Zyla, and Daniel J. Lew\*

Department of Pharmacology and Cancer Biology, Duke University, Durham, NC, USA

Corresponding author: [daniel.lew@duke.edu](mailto:daniel.lew@duke.edu)

### Abstract

Accurate detection of extracellular chemical gradients is essential for many cellular behaviors. Gradient sensing is challenging for small cells, which experience little difference in ligand concentrations on the up-gradient and down-gradient sides of the cell. Nevertheless, the tiny cells of the yeast *Saccharomyces cerevisiae* reliably decode gradients of extracellular pheromones to find their mates. By imaging the behavior of polarity factors and pheromone receptors during mating encounters, we found that gradient decoding involves two steps. First, cells bias orientation of initial polarity up-gradient, even though they have unevenly distributed receptors. To achieve this, they measure the local fraction of occupied receptors, rather than absolute number. However, this process is error-prone, and subsequent exploratory behavior of the polarity factors corrects initial errors via communication between mating partners. The mobile polarity sites convert the difficult problem of spatial gradient decoding into the easier one of sensing temporal changes in local pheromone levels.

## 24 Introduction

25

26 Chemical gradients provide cells with critical information about their surroundings,  
27 allowing them to navigate via chemotropism (gradient-directed growth) or chemotaxis  
28 (gradient-directed migration). For example, axons steer their growth up gradients of netrin to  
29 form new synapses, social amoebae crawl up gradients of cAMP to aggregate into fruiting  
30 bodies, sperm swim up gradients of chemoattractants to find eggs, and neutrophils migrate up  
31 gradients of peptides shed by bacteria or cytokines secreted by other cells of the immune  
32 system to eliminate pathogens from mammalian tissues (Alvarez, et al., 2014; Swaney, et al.,  
33 2010; von Philipsborn and Bastmeyer, 2007). In each case, cells sense external signals via G-  
34 protein coupled receptors (GPCRs), leading to cytoskeletal reorganization that produces  
35 directional growth or movement (Insall, 2013).

36 The sequence of molecular events that transduce extracellular chemical signals to  
37 produce gradient-directed outputs is perhaps best understood in the genetically tractable  
38 budding yeast *Saccharomyces cerevisiae*. Yeast are non-motile unicellular fungi, and haploid  
39 yeast cells of mating type **a** can mate with haploids of mating type  $\alpha$  to yield diploids. The  
40 haploids secrete peptide pheromones that bind GPCRs on cells of the opposite mating type ( $\alpha$ -  
41 factor is sensed by Ste2 in **a** cells, and **a**-factor is sensed by Ste3 in  $\alpha$  cells) (Wang and Dohlman,  
42 2004). Pheromone-bound receptors activate heterotrimeric G-proteins to generate GTP-G $\alpha$  and  
43 free G $\beta\gamma$ . G $\beta\gamma$  in turn recruits two key scaffold proteins, Ste5 and Far1, from the cell interior to  
44 the membrane (Nern and Arkowitz, 1999; Butty, et al., 1998; Pryciak and Huntress, 1998). Ste5  
45 recruitment leads to activation of the MAPKs Fus3 and Kss1, which induce transcription of  
46 mating-related genes and arrest the cell cycle in G1 phase in preparation for mating (Pryciak  
47 and Huntress, 1998). Ste5-induced MAPK activation also promotes cytoskeletal polarization, but  
48 Far1 recruitment is required to orient the cytoskeleton towards the mating partner (Matheos,  
49 et al., 2004; Pryciak and Huntress, 1998; Valtz, et al., 1995). Far1 transduces the pheromone  
50 gradient by providing spatial information to the conserved Rho-family GTPase Cdc42, which is  
51 the master regulator of cell polarity in yeast (Bi and Park, 2012; Nern and Arkowitz, 1999; Butty,  
52 et al., 1998; Nern and Arkowitz, 1998).

53 To establish a polarized axis, Cdc42 becomes concentrated and activated at a site on the  
54 cell cortex referred to as a “polarity patch” (Bi and Park, 2012). The localized active Cdc42 then  
55 acts through formins to orient linear actin cables towards the site, and the cables deliver  
56 secretory vesicles that mediate local growth and fusion with a mating partner (Chen, et al.,  
57 2012; Liu, et al., 2012; Pruyne and Bretscher, 2000; Evangelista, et al., 1997). Polarity  
58 establishment is thought to involve a positive feedback loop whereby local GTP-Cdc42  
59 promotes activation of further Cdc42 in its vicinity (Johnson, et al., 2011). Cdc42 is activated by  
60 the guanine nucleotide exchange factor (GEF) Cdc24 (Zheng, et al., 1994), which is recruited to  
61 the polarity patch by the scaffold protein Bem1, which is itself recruited to the patch by Cdc42  
62 effectors, providing a mechanism for positive feedback (Kozubowski, et al., 2008). Cdc24 also  
63 binds directly to Far1, and the G $\beta\gamma$ -Far1-Cdc24 complex is thought to enhance GEF-mediated  
64 Cdc42 activation at sites with elevated levels of free G $\beta\gamma$  (Nern and Arkowitz, 1999; Butty, et al.,  
65 1998; Nern and Arkowitz, 1998). Mutations that disrupt Far1-Cdc24 binding do not affect  
66 polarity establishment *per se*, but they completely abolish the ability to properly orient polarity

67 with respect to the pheromone gradient (Nern and Arkowitz, 1999; Butty, et al., 1998). Thus,  
68 Far1 provides a direct spatial connection between upstream receptor-pheromone binding and  
69 downstream Cdc42 activation, allowing the cells to exploit the pheromone gradient to find their  
70 partners.

71 Like other eukaryotic cells, yeast are thought to compare the ligand concentrations  
72 across the cell to determine the orientation of the gradient (Arkowitz, 2009). If the distribution  
73 of pheromone-activated receptors reflects the pheromone gradient, then G $\beta\gamma$ -Far1-Cdc24  
74 complexes will be enriched up-gradient, spatially biasing activation of Cdc42 to kick off positive  
75 feedback at the right location for mating. However, the accuracy of such global spatial gradient  
76 sensing is limited by the small yeast cell size (~4  $\mu\text{m}$  diameter) (Berg and Purcell, 1977), and  
77 simulations constrained by experimental data on binding and diffusion parameters suggested  
78 that the process would be inaccurate (Lakhani and Elston, 2017). Indeed, when yeast are  
79 exposed to artificial, calibrated pheromone gradients, polarized growth often starts in the  
80 wrong direction (Moore, et al., 2008; Segall, 1993). Such cells can nevertheless correct initial  
81 errors by moving the polarity site (Dyer, et al., 2013).

82 Moving a Cdc42 patch that is constantly being reinforced by positive feedback seems  
83 counterintuitive, but time-lapse imaging revealed that the patch “wandered” around the cortex  
84 of pheromone-treated cells on a several-minute timescale (Dyer, et al., 2013). Wandering was  
85 dependent actin cables and vesicle traffic, which serves to perturb the polarity patch (Savage et  
86 al 2012; Dyer et al. 2013; McClure et al. 2015). New pheromone receptors are delivered to the  
87 polarity site, and after binding pheromone the receptors are rapidly internalized and degraded  
88 (Hicke, et al., 1998; Hicke and Riezman, 1996; Schandel and Jenness, 1994; Jenness and  
89 Spatrick, 1986). As a result, pheromone receptors and their associated G proteins become  
90 concentrated in the vicinity of the polarity site, generating a sensitized region of membrane  
91 that can detect the local pheromone concentration (McClure, et al., 2015; Suchkov, et al., 2010;  
92 Ayscough and Drubin, 1998). As the polarity site wanders around the cortex, this receptive  
93 “nose” would sample pheromone levels at different locations. Studies of cells treated with  
94 uniform pheromone concentrations showed that when pheromone levels are high, the patch  
95 stops moving (McClure, et al., 2015; Dyer, et al., 2013). In principle, this “exploratory  
96 polarization” mechanism can explain error-correction by positing that movement of the patch  
97 continues until cells sense high pheromone levels indicating that the patch is directed towards a  
98 mating partner (Hegemann and Peter, 2017).

99 The extent to which yeast cells rely on global spatial sensing to orient the formation of a  
100 polarity patch, versus exploratory polarization after the patch has formed, remains unclear. A  
101 recent study found that when cells were placed in an artificial pheromone gradient in a  
102 microfluidics device, initial patch formation was random with respect to the gradient, and  
103 orientation occurred by exploratory polarization and “local sensing” (Hegemann, et al., 2015).  
104 However, it is unclear whether similar results might apply to different pheromone gradients, or  
105 to more physiological conditions in which gradients are generated by mating partners.

106 To better understand how yeast actually locate their mating partners, we imaged  
107 mating events in mixed populations of  $\alpha$  and  $\alpha$  cells. We found evidence for both global spatial  
108 sensing and error correction by exploratory polarization. Encounters between partners were  
109 characterized by (i) rapid and non-random initial clustering of polarity proteins biased towards  
110 the partner; (ii) an “indecisive phase” in which dynamic polarity sites relocalized in an apparent

111 search process; and (iii) a “committed phase” in which cells polarized stably towards mating  
112 partners, culminating in fusion. Transition from indecisive to committed behavior was  
113 associated with a rise in MAPK activity. Initial polarization was surprisingly accurate given that it  
114 occurred despite a highly non-uniform (and thus potentially misleading) distribution of  
115 receptors. We found that the variation in receptor density was corrected for via “ratiometric”  
116 sensing of the ratio of occupied vs unoccupied pheromone receptors across the cell (Bush, et  
117 al., 2016). In aggregate, our findings reveal how yeast cells can overcome the challenges  
118 imposed by small cell size and lack of cell mobility to locate mating partners.

119

## 120 **Results**

121

### 122 *Indecisive and committed phases of mating cell polarization*

123

124 To observe how cells find their mates, we mixed **a** and  $\alpha$  cells expressing differently  
125 colored polarity probes, Bem1-GFP ( $\alpha$ ) and Bem1-tdTomato (**a**), and imaged them at 2 min  
126 resolution (Video 1). Fusion events were identified from movies and the cells were tracked back  
127 to their time of “birth” (the cytokinesis that preceded the mating event). Fig. 1A (top) illustrates  
128 selected frames from a representative mating cell. This cell formed a faint initial cluster of  
129 Bem1 just 4 min after birth (blue panel), which then fluctuated in intensity and moved  
130 erratically around the cell cortex for 34 min before stably polarizing adjacent to a mating  
131 partner (orange panel). After another 16 min the two cells fused, as seen by the mixing of red  
132 and green probes. We designate the time between initial cluster formation ( $T_{ic}$ ) and stable  
133 polarization ( $T_p$ ) as the “indecisive phase”, reflecting the erratic behavior of the polarity probe.  
134 We designate the time between stable polarization ( $T_p$ ) and fusion as the “committed phase” of  
135 mating, reflecting the strong and stably located polarity site.

136 To quantify the degree of Bem1 polarization, we used a metric that uses the pixel  
137 intensity distribution within the cell to assess the degree of signal clustering (hereafter,  
138 “clustering”: see methods). Fig. 1A (graph) illustrates that Bem1 clustering fluctuated during the  
139 indecisive phase but remained high during the committed phase. This pattern was  
140 characteristic of mating cells (Fig. 1B), supporting the idea that mating involves a two-stage  
141 process. A similar two-stage process was observed for cells expressing fluorescent versions of  
142 Spa2, a polarisome component that binds and helps to localize the formin Bni1 (Video 2)  
143 (Pruyne, et al., 2004; Fujiwara, et al., 1998; Sheu, et al., 1998). Analysis of cells expressing both  
144 Bem1 and Spa2 probes revealed that although (as described previously) Spa2 clusters were  
145 more tightly focused than Bem1 clusters, the probes clustered, dispersed, and moved together  
146 (Fig. 1C). As for Bem1, Spa2 clustering fluctuated during the indecisive phase and remained  
147 stably high during the committed phase (Fig. 1D). We conclude that cells undergo a  
148 reproducible pattern of polarization during mating, with sequential indecisive and committed  
149 phases.

150 The earliest observable clustering of polarity factors occurred shortly after birth (Fig. 1E:  
151 median time 4 min after initiating cytokinesis). This initial clustering was usually weak and  
152 frequently at a different location than that of the final stable polarization (see below). During  
153 the ensuing indecisive phase, cells appeared to search for mating partners, often assembling  
154 polarity clusters adjacent to different potential partners before settling at a final location (Fig.

155 1F). The duration of the indecisive phase (Fig. 1G: median 42 min) was very variable, ranging  
156 from 10 to 120 min. This is consistent with a search process that would take a variable amount  
157 of time depending on the availability and proximity of potential mating partners. In contrast,  
158 the subsequent committed phase was consistently about 20 min (Fig. 1G), which we speculate  
159 is the time required to remodel the local cell walls to allow for cell fusion.

160

161 *Commitment is synchronous for both partners*

162

163 In our protocol, cells of each mating type are proliferating asynchronously before they  
164 are abruptly mixed. Thus, in a large majority of cases, one cell of each mating pair is born (i.e.  
165 enters G1 phase) before the other. Nevertheless, fusion is a unitary event that occurs at the  
166 same time for both. This means that the “first-born” partner must extend one or both phases of  
167 polarization while the “second-born” partner completes the previous cell cycle and “catches  
168 up” (Fig. 2A). Does the first-born locate and commit to its partner first, and then wait (Fig. 2A,  
169 top), or does the first-born remain indecisive until the second-born has caught up (Fig. 2A,  
170 bottom)? We found no difference in the average duration of the committed phase between  
171 first and second-born cells (Fig. 2B), and partners in each individual mating pair generally  
172 committed at nearly the same time (Fig. 2C). Conversely, the indecisive phase was significantly  
173 longer in first-born cells (Fig. 2D), suggesting that first-born cells remain indecisive while  
174 second-born cells complete the cell cycle, and that cells only polarize stably towards partners  
175 that are in G1 (Fig. 2A, bottom).

176 Synchronous commitment implies that there is some communication between partners  
177 that occurs only when both are in G1 phase of the cell cycle. As the only known mode of  
178 communication is via the secretion of pheromones, the simplest hypothesis to explain why  
179 commitment must wait until both cells are in G1 would be that pheromone secretion changes  
180 when cells enter G1. To assess the rate of pheromone synthesis, we introduced a fluorescent  
181 reporter whose production was driven by the major  $\alpha$ -factor gene (MF $\alpha$ 1) promoter  
182 (Achstetter, 1989; Singh, et al., 1983). Reporter signal fluctuated regularly through the cell  
183 cycle, rising in G1 and falling (due to dilution) after bud emergence (Fig. 2E). This result suggests  
184 that first-born cells would detect lower levels of pheromone until their partners entered G1,  
185 and that stable polarization towards a partner (commitment) may be triggered by increased  
186 pheromone signaling.

187

188 *Commitment coincides with an increase in MAPK activity*

189

190 One consequence of pheromone signaling is the activation of the mating MAPKs Fus3  
191 and Kss1 (Wang and Dohlman, 2004). To monitor MAPK activity in mating cells, we introduced a  
192 recently developed single-cell MAPK sensor (Durandau, et al., 2015) into our strains together  
193 with the Spa2 probe. The MAPK sensor is a fluorescent probe that moves from the nucleus to  
194 the cytoplasm when it is phosphorylated by active MAPK. In the absence of pheromone, the  
195 sensor was predominantly nuclear, although the nuclear to cytoplasmic ratio fluctuated  
196 somewhat through the cell cycle, peaking during anaphase (Fig. 3A and video 3). In a mating  
197 mix, the sensor distribution became uniform prior to fusion, reflecting an increase in MAPK  
198 activity (Fig. 3B and video 4). To quantify the degree of nuclear concentration of the MAPK

199 sensor, we measured the coefficient of variation (CV) in pixel intensity across the cell. When the  
200 probe is nuclear, the bright nuclear and dim cytoplasmic pixels yield a high CV, but when the  
201 probe distribution is uniform there is a low CV. We found considerable cell-to-cell variability in  
202 this signal, which could be largely accounted for by differences in the level of expression of the  
203 probe (Fig. S1A, B). This variability could be reduced by normalizing the CV to the maximum and  
204 minimum CV for each cell, and we developed a MAPK activity metric based on the normalized  
205 CV of the probe (Fig. S1C).

206 In mating cells, MAPK activity fluctuated but then climbed to a plateau about 20 min  
207 prior to fusion (Fig. 3C). As this was similar to the clustering behavior of polarity probes, we  
208 directly compared MAPK activity with Spa2 clustering in individual mating cells (Fig. 3D). These  
209 measures aligned well with one another in most cells, with both Spa2 clustering and MAPK  
210 activity fluctuating during the indecisive phase before rising to a stable plateau during the  
211 committed phase (Fig. 3D, E). A cross-correlation analysis of Spa2 clustering and MAPK activity  
212 during the indecisive phase revealed that they fluctuated in tandem (Fig. 3F). This correlation  
213 suggested that MAPK activity might promote stable polarization, or that polarization might lead  
214 to an increase in MAPK activity, or both.

215 To more directly ask whether an increase in MAPK activity promotes stable polarization,  
216 we induced MAPK activity in the absence of pheromone by expressing a membrane-tethered  
217 version of the MAPK scaffold Ste5 (Pryciak and Huntress, 1998). As MAPK activity increased and  
218 the MAPK sensor exited the nucleus, Spa2 switched from faint and mobile clustering to become  
219 strongly polarized (Fig. 3G). The timing varied from cell to cell, but all cells with induced MAPK  
220 eventually arrested and formed strong polarity patches (data not shown). Thus, elevated MAPK  
221 signaling is sufficient to induce polarization.

222

### 223 *Relation between pheromone sensing and polarization*

224

225 Our findings suggest that at some point during the indecisive phase, MAPK activity rises,  
226 triggering the strong and stable polarization characteristic of the committed phase. But what  
227 would make the MAPK activity increase at that point? One possibility is that pheromone  
228 secretion is tied to polarity site behavior, so that pheromone is secreted from transient and  
229 erratically changing locations during the indecisive phase. Prior work has shown that cells have  
230 a sensitized “nose” enriched in receptors and G proteins surrounding the polarity site (McClure,  
231 et al., 2015; Suchkov, et al., 2010), so if two cells happen to orient their polarity sites towards  
232 each other during the indecisive phase, one cell would emit pheromone in the immediate  
233 vicinity of receptors on the partner cell. That would produce a higher pheromone signal than  
234 when polarity clusters point away from each other (Fig. 4A). To visualize the location of  $\alpha$ -factor  
235 secretion, we imaged Sec4-GFP, a Rab GTPase highly concentrated on the secretory vesicles  
236 that deliver  $\alpha$ -factor to the cell surface (Mulholland, et al., 1997; Walch-Solimena, et al., 1997).  
237 Sec4 accumulated in regions enriched for Bem1, during the indecisive phase as well as the  
238 committed phase of polarization (Fig. 4B).

239 Putting together our findings thus far, we propose that mating cells undergo the  
240 following sequence of events. As cells undergo cytokinesis, newborn cells in G1 phase detect  
241 enough pheromone in their surroundings to arrest the cell cycle and initiate a weak and mobile  
242 level of polarization. Cells in G1 also increase their rate of pheromone production, signaling to



243 potential partners that they are ready to mate. As mobile polarity clusters explore the  
244 surrounding pheromone landscape during the indecisive phase, they also locally secrete  
245 pheromones to be sensed by their partners. When potential partners orient their polarity  
246 clusters towards each other, both cells perceive higher pheromone concentrations, leading to a  
247 simultaneous rise in MAPK activity in each partner. Higher MAPK activity leads to stronger  
248 polarity, and when MAPK activity crosses some threshold, the polarity clusters stop moving,  
249 now properly facing their partners. This leads to sustained high MAPK signaling during the  
250 committed phase, maintaining polarity until fusion can occur.

251

### 252 *Gradient sensing before initial polarity clustering*

253

254 The view of the mating process outlined above proposes an important role for polarity  
255 clusters in tracking pheromone gradients to locate partners, as recently suggested by other  
256 studies which noted mobile polarity sites in cells exposed to uniform pheromone (McClure, et  
257 al., 2015; Dyer, et al., 2013) or artificial pheromone gradients (Hegemann, et al., 2015). This  
258 idea differs markedly from the traditional view, in which initially unpolarized G1 cells first sense  
259 the pheromone gradient and only then polarize, generally in the right direction (Ismael and  
260 Stone, 2017; Ismael, et al., 2016; Suchkov, et al., 2010; Arkowitz, 2009). These views are not  
261 mutually exclusive, and it could be that significant gradient sensing takes place prior to the  
262 initial clustering of polarity factors. Indeed, we found that in our mating mixtures, cells biased  
263 the locations of their initial clusters towards their eventual mating partners (Fig. 5A), suggesting  
264 that a form of global spatial gradient sensing occurs in the few minutes between cell birth and  
265 initial clustering. In contrast, we found no bias towards the previous cytokinesis site (neck)  
266 under our conditions (Fig. 5B). The directional bias towards partners was similar in first-born  
267 and second-born cells (Fig. 5C). Among second-born cells, those that formed their initial  
268 clusters within 60° of their partners took less time to commit than those whose initial clusters  
269 were less well-oriented (Fig. 5D: median indecisive phase duration 32 min vs 48 min). Thus,  
270 gradient sensing before polarity cluster formation can shorten the search for a partner.

271

### 272 *Non-uniform pheromone receptor distribution*

273

274 How would spatial gradient sensing occur? Studies in other model systems like  
275 *Dictyostelium discoideum* indicated that receptors and their coupled G proteins were  
276 distributed uniformly around the cell surface, with active G proteins reflecting the external  
277 ligand gradient (Janetopoulos, et al., 2001; Jin, et al., 2000). Receptor distribution has been  
278 harder to assess in yeast cells, for technical reasons stemming from the rapid secretion and  
279 recycling of receptors (Suchkov, et al., 2010). Transit of pheromones and pheromone receptors  
280 through the secretory pathway is rapid (5-10 min)(Losev, et al., 2006; Govindan, et al., 1995). In  
281 the presence of  $\alpha$ -factor, Ste2 is then endocytosed on a 10-min timescale and delivered to the  
282 vacuole for degradation (Hicke, et al., 1998; Hicke and Riezman, 1996; Schandel and Jenness,  
283 1994; Jenness and Spatrick, 1986). As GFP maturation occurs on a 30-min timescale (Iizuka, et  
284 al., 2011; Gordon, et al., 2007), much of the GFP-tagged receptor at the cell surface is not yet  
285 fluorescent. Moreover, the GFP moiety survives intact in the vacuole following receptor  
286 degradation, yielding a high vacuolar fluorescence signal. To partially resolve these issues, we

287 tagged Ste2 with sfGFP, which matures on a 6-min timescale (Khmelinskii, et al., 2012).  
288 Although bright vacuoles remained, the surface Ste2-sfGFP was clearly visible (Fig 6A), allowing  
289 us to assess Ste2 distribution. In cells that were not exposed to  $\alpha$ -factor, Ste2 distribution  
290 varied throughout the cell cycle, accumulating in the bud (enriched at the tip) and depleted in  
291 the mother during bud growth, and then accumulating at the neck during cytokinesis (Fig. 6B).  
292 G1 cells displayed quite variable Ste2 distributions, ranging from nearly uniform to highly  
293 polarized (Fig. 6C: left). Quantification of surface Ste2 distribution revealed a 3-fold difference  
294 (on average) in Ste2 concentration from one side of the cell to the other (Fig. 6C: right).

295 The non-uniform receptor distribution poses a significant problem for accurate gradient  
296 sensing, because cells would be preferentially sensitive to pheromone on the side where  
297 receptors are enriched, which would not necessarily correspond to the side facing a mating  
298 partner. To directly observe the relationship between Bem1 clustering and Ste2 distribution, we  
299 imaged MAT $\alpha$  cells carrying both Ste2-sfGFP and Bem1-tdTomato, mixed with MAT $\alpha$  cells in  
300 mating reactions. If receptor density impacts the location of initial clustering, we would expect  
301 that Bem1 clustering would occur preferentially on the side with higher Ste2 signal. Individual  
302 cells clustered Bem1 at various different locations relative to the Ste2 distribution, and in  
303 several cells the initial Bem1 cluster formed adjacent to a mating partner even though Ste2 was  
304 concentrated at the opposite end of the cell (Fig. 6D). Averaging revealed no clear spatial  
305 correlation between the location of Bem1 initial clustering and the Ste2 distribution (Fig. 6E).  
306 We conclude that cells are able to perform a surprisingly accurate degree of gradient sensing  
307 prior to polarization, despite having non-uniform receptor distributions.

308

### 309 *Effect of changing receptor distribution on gradient sensing*

310

311 To probe the degree to which receptor distribution influences the accuracy of gradient  
312 sensing, we sought to manipulate receptor distribution. Ste2 distribution reflects a dynamic  
313 balance between polarized secretion of new Ste2, slow diffusion at the plasma membrane, and  
314 retrieval by endocytosis (Suchkov, et al., 2010; Valdez-Taubas and Pelham, 2003). Endocytosis is  
315 more rapid for ligand-bound Ste2 (which undergoes phosphorylation and ubiquitination) than  
316 for unbound Ste2 (which is endocytosed at a slower basal rate)(Hicke, et al., 1998; Terrell, et al.,  
317 1998; Hicke and Riezman, 1996). To manipulate Ste2 distribution, we used Ste2 mutants that  
318 either lacked endocytosis signals (Ste2<sup>7XR-GPAAD</sup>, allowing accumulation all over the membrane)  
319 (Ballon, et al., 2006; Terrell, et al., 1998) or had a constitutively active strong endocytosis signal  
320 (Ste2<sup>NPF</sup> yielding a highly polarized distribution with a bias toward the mother-bud neck)(Tan, et  
321 al., 1996) (Fig. 7A, B). As endocytosis is needed for Ste2 degradation, Ste2<sup>7XR-GPAAD</sup> was more  
322 abundant than Ste2 or Ste2<sup>NPF</sup> (Fig. 7C), and in halo assays cells expressing Ste2<sup>NPF</sup> were slightly  
323 less sensitive to pheromone while cells expressing Ste2<sup>7XR-GPAAD</sup> were more sensitive to  
324 pheromone (Fig. 7D). Correspondingly, in mating mixes cells with Ste2<sup>NPF</sup> sometimes re-entered  
325 the cell cycle despite being adjacent to potential partners, while cells with Ste2<sup>7XR-GPAAD</sup> were  
326 more likely to remain arrested and mate (Fig. S2). This was reflected in the duration of the  
327 indecisive phase, which we quantified among all cells that were born and remained  
328 immediately adjacent to a G1 cell of opposite mating type until they either mated or budded  
329 (Fig. 7E). Cells that budded instead of committing to a partner were recorded as never entering  
330 the committed phase. Among the cells that successfully mated, indecisive phases had similar



331 durations, suggesting that indecisive phase dynamics were unaffected by the changes in  
332 receptor distribution.

333 To quantify the accuracy of initial clustering, we recorded the location of Bem1 clusters  
334 among all cells that were born immediately adjacent to a G1 cell of opposite mating type,  
335 including those that mated, budded, or failed to do either by the end of the movie. We found  
336 that cells despite the dramatic difference in receptor distribution (Fig. 7B), cells with Ste2<sup>NPF</sup> or  
337 Ste2<sup>7XR-GPAAD</sup> were no less accurate than wild type cells at orienting their initial clusters towards  
338 adjacent partners (Fig. 7F). Cells with Ste2<sup>7XR-GPAAD</sup> were a little more accurate than wild-type  
339 cells (Fig 7F), perhaps indicating that abundant and uniformly distributed Ste2 improves  
340 gradient sensing, but the difference was not statistically significant for the number of cells  
341 analyzed. The finding that even cells with a highly asymmetrical receptor distribution can  
342 respond to a pheromone gradient suggests that yeast have a mechanism to correct for  
343 variations in receptor density.

344

#### 345 *Ratiometric sensing of receptor occupancy*

346

347 One way to correct for variations in receptor density would be to measure the local ratio  
348 of ligand-bound to unbound receptors (i.e. ratiometric sensing). If cells were to respond to the  
349 spatial distribution of the *ratio* of active/total receptors, rather than the spatial distribution of  
350 active receptors, then differences in the local receptor density would not distort a cell's ability  
351 to determine the orientation of the pheromone gradient. A recent study (Bush, et al., 2016)  
352 proposed a mechanism for ratiometric sensing by Ste2, based on the observation that the RGS  
353 protein (regulator of G-protein signaling) Sst2 binds to unoccupied Ste2 (Ballon, et al., 2006).  
354 Pheromone-bound Ste2 loads GTP on G $\alpha$ , whereas unbound Ste2-Sst2 promotes GTP hydrolysis  
355 by G $\alpha$ , so the level of activated G $\alpha$  depends on the ratio between pheromone-bound and  
356 unbound Ste2 (Fig. 8A). Although originally proposed as a global mechanism to integrate  
357 signaling from all Ste2 (Bush, et al., 2016), in principle this mechanism could also apply locally to  
358 extract the gradient of pheromone from the spatial distribution of bound/unbound receptor.

359 Sst2-based ratiometric sensing can be disrupted by replacing Sst2 with a human paralog,  
360 hsRGS4, which has similar GAP activity towards G $\alpha$  but does not associate with Ste2 (Bush, et  
361 al., 2016). hsRGS4 is myristoylated and localized uniformly to the plasma membrane (Fig. 8B).  
362 We found that two copies of hsRGS4 expressed from the *SST2* promoter were sufficient to  
363 restore wildtype pheromone sensitivity (as judged by halo assays) to cells lacking endogenous  
364 Sst2 (Fig. 8C). Compared with cells containing Sst2, cells with hsRGS4x2 were significantly worse  
365 at orienting at their initial Bem1 clusters towards their partners (Fig. 8D). Instead, the initial  
366 clusters in hsRGS4x2 cells were strongly biased towards the previous mother-bud neck (Fig. 8E),  
367 a region of high receptor density (Fig. 6). Indeed, a direct comparison showed that unlike wild-  
368 type cells, hsRGS4x2 cells displayed a strong tendency to establish initial clusters of Bem1 at  
369 sites enriched for Ste2 (Fig. 8F). Thus, gradient sensing depends on the endogenous RGS  
370 protein Sst2, which may assist in this process by linking G $\alpha$  GTP hydrolysis to the location of  
371 unbound receptor.

372 If the inaccurate gradient sensing exhibited by hsRGS4x2 cells is indeed due to  
373 disruption of ratiometric sensing, then the orientation defect of hsRGS4x2 should be corrected  
374 if the cells were to have uniformly distributed receptors (i.e. ratiometric sensing should be

375 unnecessary if receptor density is uniform). We used the more uniformly distributed Ste2<sup>7XR-</sup>  
376 <sup>GPAAD</sup> to test this hypothesis, and found that Ste2<sup>7XR-GPAAD</sup> restored the accuracy of initial Bem1  
377 clustering to wildtype levels in hsRGS4x2 cells (Fig. 8D,E,F). These findings suggest that yeast  
378 cells use Sst2-dependent local ratiometric sensing of receptor occupancy to extract accurate  
379 information from the pheromone gradient despite having non-uniform receptor density.

380

## 381 Discussion

### 382 Initial polarity cluster location is surprisingly accurate

383 The rapid diffusion of peptide pheromones and the small size of the yeast cell led to the  
384 expectation that there would be only a small difference in pheromone concentration between  
385 the up- and down-gradient sides of the cell. This poses a fundamental difficulty in extracting  
386 accurate directional information in the face of molecular noise (Berg and Purcell, 1977). Indeed,  
387 a recent study on cells responding to a 0.5 nM/ $\mu$ m pheromone gradient found that initial  
388 polarity cluster location was close to random with respect to the gradient (Hegemann, et al.,  
389 2015). Moreover, simulations of gradient sensing suggested that even with uniformly  
390 distributed receptors and error-free interpretation of the ligand-bound receptor distribution,  
391 the signal from such gradients would be obscured by molecular noise and diffusion (Lakhani  
392 and Elston, 2017). In principle, time-averaging of the ligand-bound receptor distribution could  
393 extract the signal from the noise, but we show that initial clustering of polarity factors occurs  
394 5.1 +/- 2.7 min from cell birth, which is too fast to allow for significant time averaging given the  
395 slow timescale of yeast pheromone-receptor binding and dissociation (Bajaj, et al., 2004; Raths,  
396 et al., 1988; Jenness, et al., 1986). If pheromone levels were high enough, however, this rapid  
397 polarization may be able to take advantage of pre-equilibrium sensing and signaling (Ventura,  
398 et al., 2014), a proposed mechanism in which directionality is inferred from the rates of  
399 pheromone binding rather than steady-state distributions.

400 Two other factors make it even harder for yeast cells to extract accurate spatial information  
401 from pheromone gradients. First, the polarity circuit in yeast contains strong positive feedback  
402 sufficient to allow symmetry-breaking polarization in the absence of a directional cue (Chiou, et  
403 al., 2017; Johnson, et al., 2011). This allows cells to polarize in random directions when treated  
404 with uniform pheromone concentrations (Dyer, et al., 2013; Strickfaden and Pryciak, 2008), and  
405 would be expected to enable noise-driven polarization in random directions in cells responding  
406 to a shallow pheromone gradient (Chou, et al., 2008). Second, we found that yeast cells do not  
407 have uniform receptor distributions. The polarized secretion, slow diffusion, and subsequent  
408 endocytosis of pheromone receptors resulted in significant receptor asymmetry, with (on  
409 average) three-fold more concentrated receptors on one side of the cell than the other. This  
410 creates a receptor gradient that is significantly steeper than the assumed pheromone gradient  
411 detected by the cells. As the receptor gradient is randomly oriented with respect to the mating  
412 partner, this poses a serious hurdle in accurate gradient detection.

413 Despite the difficulties enumerated above, we found that the location of initial polarity factor  
414 clustering in mating mixtures was highly non-random and surprisingly accurate, with more than  
415 40% of cells clustering within 30° of the correct direction and less than 5% of cells clustering in  
416 the opposite segment (a random process would have 17% of cells polarizing in each of these

417 segments). This finding suggests that physiological pheromone gradients may be considerably  
418 steeper than previously assumed, and/or that cells possess unappreciated mechanisms to  
419 overcome the difficulties in accurate gradient detection discussed above.

#### 420 **Orientation accuracy is enhanced by ratiometric sensing**

421 One way to avoid being misled by an asymmetric receptor distribution would be to compare  
422 the local *ratio* of occupied and unoccupied receptors, rather than simply the density of  
423 occupied receptors, across the cell surface. An elegant mechanism to extract information about  
424 the fraction of occupied receptors was proposed by Bush, et al. (2016). Because the RGS  
425 protein Sst2 binds to unoccupied receptors (Ballon, et al., 2006), those receptors promote GTP  
426 hydrolysis by G $\alpha$ . Conversely, occupied receptors catalyze GTP-loading by G $\alpha$ . Thus, the net  
427 level of GTP-G $\alpha$  reflects the fraction (and not the number) of occupied receptors on the cell  
428 (Bush, et al., 2016). For this mechanism to promote *local* ratiometric sensing requires  
429 additionally that a pheromone-bound receptor diffuse slowly relative to its lifetime at the  
430 surface (~10 min) (Jenness and Spatrick, 1986), so that information about where receptors were  
431 when they bound to pheromone is not lost. Similarly, GTP-G $\alpha$  and G $\beta\gamma$  must diffuse slowly  
432 relative to the timeframe for G $\alpha$  GTP hydrolysis and G protein re-association, so that  
433 information about where they were when they became activated is not lost.

434 We found that when RGS function was delocalized by replacing Sst2 (which binds unoccupied  
435 receptors) with an equivalent amount of hsRGS4 (which binds the plasma membrane), the  
436 accuracy of initial polarity clustering was severely compromised. Instead of polarizing towards  
437 potential partners, these cells assembled polarity clusters at regions where receptors were  
438 concentrated (often at the site of the last cell division or neck). Thus, abrogating the Sst2-based  
439 ratiometric sensing mechanism allowed cells to be misled by the asymmetric receptor  
440 distribution. Accurate orientation could be restored to these cells by manipulations that made  
441 receptor distribution more uniform. In sum, our findings suggest that local ratiometric sensing  
442 compensates for uneven receptor distribution and allows more accurate polarization towards  
443 mating partners.

#### 444 **Why is receptor distribution non-uniform?**

445 Blocking receptor endocytosis allowed receptors to accumulate all over the cell surface in a  
446 much more uniform distribution than that seen in wild-type cells. In our mating conditions, this  
447 promoted a slightly more accurate orientation of initial polarity factor clustering towards  
448 mating partners, and a small improvement in mating efficiency. Why, then, would cells  
449 internalize their receptors and create the need for error correction by ratiometric sensing? One  
450 possible answer stems from the fact that wild yeast (unlike lab strains) are able to switch  
451 mating type. Without receptor endocytosis, cells may be unable to clear pre-existing receptors  
452 during mating type switching, generating a situation in which cells arrest in response to their  
453 own newly secreted pheromones after a switch. We speculate that receptor endocytosis is  
454 necessary to clear the membrane of old receptors when switching mating types, and that  
455 receptor asymmetry is the price that cells pay for this advantage.

#### 456 **Error correction following initial clustering of polarity factors**

457 Although initial polarity clusters were biased to occur near potential mating partners, the  
458 process was error-prone and about 60% of cells failed to orient initial polarity within 30° of the  
459 correct direction. Nevertheless, these cells did eventually polarize towards partners and mate  
460 successfully, indicating the presence of a potent error correction mechanism. We found that  
461 after initial clustering, polarity factor clusters relocated erratically during an “indecisive phase”  
462 of variable duration (48 +/- 24 min). Even cells that had correctly assembled initial polarity  
463 clusters close to mating partners exhibited an indecisive phase, although of somewhat shorter  
464 duration. During this phase, clusters fluctuated in intensity (concentration of polarity factors in  
465 the cluster), extent (broader vs more focused clusters), location, and number (transiently  
466 showing no cluster or 2-3 clusters instead of a single cluster). The dynamic polarity clusters  
467 were able to polarize actin cables, as we detected frequent accumulation of secretory vesicles  
468 at cluster locations. We suggest that this erratic behavior represents a search process in which  
469 weak polarity clusters act both as sources of pheromone secretion and locations of pheromone  
470 sensing, allowing communication between potential mating partners. At the end of the  
471 indecisive phase, cells developed strong and stable polarity sites correctly oriented towards  
472 their partners.

473 The strongest evidence that partners are engaged in communicating with each other during the  
474 indecisive phase is that mating pairs ended the indecisive behavior nearly simultaneously  
475 (within 5 min of each other). As one partner was born before the other, the durations of their  
476 indecisive phases were often quite different, but they transitioned to stable polarization  
477 together. Strengthening of the polarity cluster was correlated with an increase in mating MAPK  
478 activity, and synthetic induction of MAPK without pheromone led to a similar strengthening of  
479 polarity clusters. We speculate that during the indecisive phase, the cells are exposed to a  
480 dynamic and constantly changing pheromone landscape. When a mobile polarity cluster is  
481 distant from its partner’s cluster, both cells detect relatively low levels of pheromone, leading  
482 to intermediate levels of MAPK activity. But if clusters happen to point directly at each other,  
483 each cell detects a higher pheromone concentration, leading to an increase in MAPK activity.  
484 Increased MAPK then strengthens and stabilizes the polarity cluster, perhaps leading to  
485 increased local pheromone secretion and hence increased signaling in a positive feedback loop.

#### 486 **Exploratory polarization as a mechanism for partner selection**

487 Because the search strategy discussed above depends on polarized pheromone secretion and  
488 detection, we call this process “exploratory polarization”. This behavior is strikingly similar to  
489 the “speed dating” behavior recently described for mating cells of the distantly related fission  
490 yeast *Schizosaccharomyces pombe* (Merlini, et al., 2016; Bendezu and Martin, 2013). In that  
491 system, potential mating partners exhibit a prolonged period in which they sequentially  
492 assemble and disassemble a weak polarity cluster at multiple locations. Clusters that happen to  
493 assemble in the vicinity of a cluster from a mating partner become strengthened and stabilized,  
494 presumably due to detection of a higher pheromone level. Thus, distantly related yeasts that  
495 mate under very different physiological circumstances (rich nutrients for budding yeast,  
496 starvation conditions for fission yeast) appear to have converged on a common and highly  
497 effective search strategy.

498 Exploratory polarization is flexible and responsive to dynamic external conditions. We found  
499 that cells abruptly reduced their level of pheromone production when they transitioned from  
500 G1 to S phase. Thus, if a potential partner were to enter the cell cycle, a cell would quickly  
501 detect reduced pheromone signaling and resume the search for other potential partners. We  
502 also noticed that cells with two potential partners nearby could transiently orient clusters  
503 towards both partners. However, that situation was unstable and cells only strengthened one  
504 polarity cluster and committed to one partner. The basis for restricting polarity to a single site  
505 in mating cells is unknown, but may be due to a competition phenomenon as documented for  
506 vegetative yeast cells that pick a single bud site (Chiou, et al., 2018; Wu, et al., 2015; Howell, et  
507 al., 2012).

508 An additional elegant feature of exploratory polarization is that it converts a very difficult  
509 problem (extracting directional information from shallow and noisy pheromone gradients) into  
510 a much easier one (detecting a sharp temporal increase in local pheromone level).

## 511 **Conclusions**

512 Yeast cells locate mating partners via a combination of ratiometric spatial sensing and  
513 exploratory polarization. Ratiometric sensing of the fraction of occupied receptors compensates  
514 for uneven receptor density at the cell surface, allowing cells to decode the pheromone  
515 gradient and tentatively identify the locations of potential mating partners. There follows an  
516 indecisive period of exploratory polarization in which cells can rapidly scan for partners, wait for  
517 nearby potential partners to finish the cell cycle, and identify suitable partners by reciprocal  
518 communication through pheromone secretion at the polarity sites. When partners' polarity  
519 clusters align, cells detect higher pheromone levels, leading to increased MAPK activation and  
520 stabilization of the polarity site. The partners then enter a committed phase of about 20  
521 minutes with stable polarization and high MAPK activity, after which they fuse.

522

## 523 **Acknowledgements:**

524 We thank Serge Pelet (UNIL, Switzerland), Alejandro Colman-Lerner (University of Buenos Aires,  
525 Argentina), and Patrick Ferree (Duke University) for providing plasmid reagents. Thanks to Tim  
526 Elston, Stefano Di Talia, and Amy Gladfelter as well as members of the Lew lab for stimulating  
527 conversations and comments on the manuscript. This work was funded by NIH/NIGMS grants  
528 GM103870 and GM122488 to D.J.L.



## 529 Materials and Methods

### 530 Yeast strains and plasmids

531 Yeast strains used in this study are listed in Table 1. Standard yeast molecular and genetic  
 532 procedures were used to generate the strains. All strains are in the YEF473 background (*his3-*  
 533 *Δ200 leu2-Δ1 lys2-801 trp1-Δ63 ura3-52*) (Bi and Pringle, 1996). The following alleles were  
 534 previously described: Bem1-GFP (Kozubowski, et al., 2008), Bem1-tdTomato and Spa2-mCherry  
 535 (Howell, et al., 2012), GFP-Sec4 (Dyer, et al., 2013), STE2<sup>7XR-GPAAD</sup> (McClure, et al., 2015), Ste7<sub>1-</sub>  
 536 <sub>33</sub>-NLS-NLS-mCherry (Durandau, et al., 2015), hsRGS4-CFP (Bush, et al., 2016).

Table 1.

| <b>Strain</b> | <b>Relevant Genotype</b>                                                                                                                       |
|---------------|------------------------------------------------------------------------------------------------------------------------------------------------|
| DLY7593       | <i>MATα ura3:BEM1-GFP:URA3</i>                                                                                                                 |
| DLY7594       | <i>MATa ura3:BEM1-GFP:URA3</i>                                                                                                                 |
| DLY8156       | <i>MATα</i>                                                                                                                                    |
| DLY9070       | <i>MATα BEM1-GFP:LEU2</i>                                                                                                                      |
| DLY12943      | <i>MATa BEM1-tdTomato:HIS3</i>                                                                                                                 |
| DLY13771      | <i>MATa BEM1-tdTomato:HIS3, GFP-SEC4:URA3</i>                                                                                                  |
| DLY20713      | <i>MATa SPA2-mCherry:hyg<sup>R</sup>, STE2-sfGFP:URA3</i>                                                                                      |
| DLY20715      | <i>MATa SPA2-mCherry:hyg<sup>R</sup>, STE<sup>NPF</sup>-sfGFP:URA3</i>                                                                         |
| DLY21070      | <i>MATα BEM1-tdTomato:HIS3</i>                                                                                                                 |
| DLY21203      | <i>MATa SPA2-mCherry:hyg<sup>R</sup>, STE2-sfGFP:URA3, bar1ΔURA3</i>                                                                           |
| DLY21206      | <i>MATa SPA2-mCherry:kan<sup>R</sup>, STE<sup>NPF</sup>-sfGFP:URA3, bar1ΔURA3</i>                                                              |
| DLY21295      | <i>MATa STE2<sup>7XR-GPAAD</sup>:URA3</i>                                                                                                      |
| DLY21301      | <i>MATa STE2<sup>NPF</sup>:URA3</i>                                                                                                            |
| DLY21379      | <i>MATa BEM1-tdTomato:HIS3, SPA2-GFP:HIS3</i>                                                                                                  |
| DLY21704      | <i>MATa SPA2-mCherry:kan<sup>R</sup>, STE2<sup>7XR-GPAAD</sup>-sfGFP:LEU2:URA3, bar1ΔURA3</i>                                                  |
| DLY21705      | <i>MATa SPA2-mCherry:hyg<sup>R</sup>, STE2<sup>7XR-GPAAD</sup>-sfGFP:LEU2:URA3</i>                                                             |
| DLY22058      | <i>MATa ura3:BEM1-GFP:URA3, STE2<sup>NPF</sup>:URA3</i>                                                                                        |
| DLY22243      | <i>MATa BEM1-tdTomato:HIS3, STE2-sfGFP:URA3</i>                                                                                                |
| DLY22259      | <i>MATa SPA2-GFP:HIS3, ura3:Ste7<sub>1-33</sub>-NLS-NLS-mCherry:URA3</i>                                                                       |
| DLY22318      | <i>MATa BEM1-GFP:LEU2, SST2:hsRGS4-CFP:kan<sup>R</sup></i>                                                                                     |
| DLY22321      | <i>MATa BEM1-GFP:LEU2</i>                                                                                                                      |
| DLY22340      | <i>MATα BEM1-tdTomato:HIS3</i>                                                                                                                 |
| DLY22397      | <i>MATa BEM1-GFP:LEU2, STE2<sup>7XR-GPAAD</sup>:URA3</i>                                                                                       |
| DLY22520      | <i>MATa BEM1-GFP:LEU2, SST2:hsRGS4-CFP:kanR, ura3:P<sub>SST2</sub>-hsRGS4-CFP:URA3</i>                                                         |
| DLY22606      | <i>MATa BEM1-GFP:LEU2, STE2<sup>7XR-GPAAD</sup>:URA3, SST2:hsRGS4-CFP:kan<sup>R</sup>, ura3:P<sub>SST2</sub>-hsRGS4-CFP:URA3</i>               |
| DLY22883      | <i>MATα, BEM1-tdTomato:HIS3, leu2:P<sub>MFA1</sub>-sfGFP:LEU2</i>                                                                              |
| DLY22764      | <i>MATa SPA2-GFP:HIS3, ura3:Ste7<sub>1-33</sub>-NLS-NLS-mCherry:URA3, ste5:P<sub>GAL1</sub>-STE5-CTM:P<sub>ADH1</sub>-GAL4BD-hER-VP16:LEU2</i> |

537 Spa2-GFP tagged at the endogenous locus was generated by the PCR-based method using  
538 pFA6-GFP(S65T)-HIS3MX6 as template (Longtine, et al., 1998).

539 To express Ste2-sfGFP, sfGFP was amplified by PCR using pFA6a-link-yoSuperfolderGFP-KAN  
540 (Addgene plasmid 44901) as template, with primers that added *NotI* sites at the ends. This was  
541 used to generate DLB4295, a plasmid with a pRS306 backbone (Sikorski and Hieter, 1989) and a  
542 C-terminal piece of the *STE2* ORF (bases 600-1296) fused to sfGFP and followed by 198 bp of  
543 the *STE2* 3'-UTR. Digestion at the unique *Clal* site in *STE2* targets integration of this plasmid to  
544 the endogenous *STE2* locus, tagging full-length Ste2 with sfGFP at the C-terminus.

545 Similar plasmids were used to express Ste2<sup>7XR-GPAAD</sup>-sfGFP (DLB4296) and Ste2<sup>NPF</sup>-sfGFP  
546 (DLB4297) at the endogenous *STE2* locus. Ste2<sup>NPF</sup> was generated by first amplifying a fragment  
547 of *STE2* using primers that introduced a GGA → AAT mutation (G<sub>392</sub>N substitution) (Tan, et al.,  
548 1996) and cloning the fragment back into *STE2*.

549 Ste7<sub>1-33</sub>-NLS-NLS-mCherry was integrated at *ura3* using pED45 (pRS306-*P<sub>RPS2</sub>*-Ste7<sub>1-33</sub>-NLS-NLS-  
550 *mCherry*) as described (Durandau, et al., 2015).

551 To compromise ratiometric sensing by Sst2, we replaced the endogenous *SST2* with hsRGS4-CFP  
552 using A550 (pRS406-K-*hsRGS4-CFP*) as described (Bush, et al., 2016). Because this was  
553 insufficient to restore wild-type pheromone sensitivity in our strain background, *P<sub>SST2</sub>*-*hsRGS4*-  
554 *CFP* was amplified by PCR and cloned into pRS306 using *XbaI* to generate DLB4414. Digestion  
555 with *StuI* was then used to target integration of a second copy of hsRGS4-CFP at *URA3*.

556 To make the MF $\alpha$ 1 reporter, the MF $\alpha$ 1 promoter (506 base pairs upstream of the ATG) was  
557 amplified with primers that added *ApaI* and *HindIII* sites, and cloned upstream of a reporter  
558 protein with the first 28 residues of Psr1 fused to GFP, followed by the *ADH1* 3'-UTR, in a  
559 plasmid with a pRS305 (*LEU2*) backbone (Sikorski and Hieter, 1989). The Psr1<sub>1-28</sub>-GFP reporter  
560 was replaced with sfGFP, which was cloned from pFA6a-link-yoSuperfolderGFP-KAN (Addgene  
561 plasmid 44901). Digestion at the *PpuMI* in the *LEU2* sequence was used to target integration at  
562 *leu2*.

563 To induce MAPK activation without adding pheromone, we generated a plasmid, DLB4239  
564 (pRS305-*STE5*<sub>5'UTR</sub>- *STE5*<sub>3'UTR</sub>- *P<sub>ADH1</sub>*-*GAL4BD*-*hER*-*VP16*-*P<sub>GAL1</sub>*-*STE5*-*CTM*), that can be used to  
565 replace the endogenous *STE5* locus with two genes: (i) a hybrid transcription factor that  
566 activates Gal4 target genes in response to estradiol (*GAL4BD*-*hER*-*VP16*) (Takahashi and Pryciak,  
567 2008), and (ii) a *GAL1* promoter driving expression of a membrane-targeted version of Ste5  
568 (*P<sub>GAL1</sub>*-*STE5*-*CTM*) (Pryciak and Huntress, 1998). Addition of estradiol activates the transcription  
569 of membrane-targeted Ste5, which leads to activation of the mating MAPKs. The plasmid has a  
570 pRS305 (*LEU2*) backbone and contains regions of the *STE5* 5' and 3'-UTRs upstream of the  
571 hybrid transcription factor. DLB4239 was digested with *PacI*, which cuts between the *STE5* 5'  
572 and 3'-UTR regions to replace endogenous *STE5* with the two genes.

### 573 **Live-cell microscopy**

574 Cells were grown to mid-log phase (OD<sub>600</sub> ≈ 0.4) overnight at 30°C in complete synthetic  
575 medium (CSM, MP Biomedicals, LLC.) with 2% dextrose (Macron). Cultures were diluted to

576 OD<sub>600</sub> = 0.1. For mating mixtures, the relevant strains were mixed 1:1 immediately before  
577 mounting on slabs. Cells were mounted on CSM slabs with 2% dextrose solidified with 2%  
578 agarose (Hoefer), which were then sealed with petroleum jelly. For Ste5-CTM MAPK induction  
579 (Fig. 4A), slabs also contained 20 nM  $\beta$ -estradiol (Sigma). Cells were imaged in a temperature  
580 controlled chamber set to 30°C.

581 Images were acquired with an Andor Revolution XD spinning disk confocal microscope (Andor  
582 Technology, Olympus) with a CSU-X1 5000 rpm confocal scanner unit (Yokogawa), and a  
583 UPLSAPO 100x/1.4 oil-immersion objective (Olympus), controlled by MetaMorph software  
584 (Molecular Devices). Images were captured by an iXon3 897 EM-CCD camera with 1.2x auxiliary  
585 magnification (Andor Technology).

586 For high resolution images of Ste2-sfGFP, Ste2<sup>NPF</sup>-sfGFP, and Ste2<sup>7XR-GPAAD</sup>-sfGFP (Fig. 6A, C, Fig.  
587 7A, B), z-stacks with 47 planes were acquired at 0.14  $\mu$ m intervals. The laser power was set to  
588 30% maximal output, EM gain was set to 200, and the exposure for the 488 nm laser was set to  
589 250 ms. For all other microscopy, z-stacks with 15 images were acquired at 0.5  $\mu$ m z-steps every  
590 2 min, laser power was set to 10% maximal output for the relevant 488 nm, 561 nm, or 445 nm  
591 lasers, EM gain was set to 200, and the exposure time was 200 ms.

592 All fluorescent images were denoised using the Hybrid 3D Median Filter plugin for ImageJ,  
593 developed by Christopher Philip Mauer and Vytas Bindokas.

#### 594 **Analysis of the timing of cell cycle and mating events**

595 Bud emergence was scored using the membrane-targeted Psr1-GFP reporter (Lai, et al., 2018;  
596 Kuo, et al., 2014). Cytokinesis was recorded as the first time point when a strong Bem1 signal  
597 was visible at the neck. Initial clustering was recorded as the first time point after cytokinesis  
598 when a Bem1 cluster was clearly visible and distinguishable from background noise.

599 Polarization was recorded as the time point when the Bem1 patch reached its final stable  
600 location and increased in intensity. If the patch appeared at the correct location, but then  
601 transiently moved to a new location before returning, polarization was recorded as the time  
602 point when the patch returned. Fusion was recorded as the time when cytoplasmic mixing of  
603 different color probes became detectable.

#### 604 **Analysis of polarity factor clustering**

605 To quantify the degree of clustering of the polarity probes Spa2-mCherry, Bem1-tdTomato, and  
606 Bem1-GFP, we calculated a “deviation from uniformity” metric from maximum projections of  
607 fluorescent z-stack images. Deviation from uniformity, referred to here as clustering (CL),  
608 compares the cumulative distribution of pixel intensities in an actual cell, with that in a  
609 hypothetical cell with the same range of pixel intensities that are uniformly distributed. That is,  
610 CL measures how different the pixel intensity distribution is from a uniform distribution, which  
611 reflects the degree to which the signals are clustered.

612 An elliptical region of interest (ROI) was drawn around each cell at each time point. Raw pixel  
613 intensities ( $p$ ) within each ROI were normalized to a minimum of 0 and maximum of 1:

$$614 \quad i = \left( \frac{p - p_{min}}{p_{max} - p_{min}} \right)$$

615 A cumulative distribution (D) of pixel intensities (i) within the cell is then calculated as:

$$616 \quad D_i = \frac{\text{(no. of pixels with intensity } < i \text{)}}{\text{(total no. of pixels)}}$$

617 For a cell with uniformly distributed pixel intensities, the cumulative distribution (U) is:

$$618 \quad U_i \approx i$$

619 500 uniformly-spaced i-values from 0 to 1 were indexed in ascending order as  $n = 1, 2, 3, \dots,$   
620 500. The deviation from uniformity metric (CL) was calculated as:

$$621 \quad CL = 2 \cdot \sum_{n=1}^{500} (D_i - U_i)$$

622 CL approaches a maximum of 1 when a small fraction of pixels exhibit near the maximum  
623 intensity, while most pixels are clustered near the minimum intensity – as seen in a highly  
624 polarized cell. CL is sensitive to the size of the patch, and the distribution of intensities within  
625 the patch – a small patch with sharp edges yields a high CL, while a broad patch with graded  
626 edges yields a low CL. As a result, CL is a sensitive indicator of the transition between the  
627 indecisive and committed phases.

628 CL was measured using a MATLAB-based graphical user interface called ROI\_TOI\_QUANT\_V8,  
629 developed by Denis Tsygankov.

### 630 **Analysis of initial polarity cluster orientation**

631 Initial orientation was measured at the time of initial clustering. For orientation relative to the  
632 partner (Fig. 5A,C; Fig. 7F; Fig 8D), we measured the angle between the line from the center of  
633 the cell being scored to the centroid of the initial cluster, and a line from the cell center to the  
634 closest surface of the nearest G1 cell of the opposite mating type. For orientation relative to  
635 the neck (Fig. 5B; Fig. 8E), we measured the angle between the line from the center of the cell  
636 being scored to the centroid of the initial cluster, and a line from the cell center to the center of  
637 the previous division site. Angles were then grouped into segments of  $30^\circ$  increments.

### 638 **Analysis of $\alpha$ -factor synthesis through the cell cycle**

639 The  $P_{MF\alpha1}$ -sfGFP reporter drives synthesis of sfGFP from the MF $\alpha$ 1 promoter. MF $\alpha$ 1 is the major  
640  $\alpha$ -factor encoding gene. Average fluorescence intensity of the probe was measured from  
641 maximum projection images within an elliptical region of interest drawn around each cell.  
642 Intensity values were normalized to the value at the end of G1 by dividing by the intensity at  
643 the time of bud emergence (for cells with  $>1$  cell cycle, the first bud emergence was used). To  
644 express intensity as a function of cell cycle, we set the time of the emergence of the first bud to  
645 0, and the time of the emergence of the second bud to 100.

### 646 **Analysis of MAPK activity**

647 MAPK activity was measured using maximum projection fluorescent images of the sensor Ste7-  
648 NLS-NLS-mCherry. As demonstrated in (Durandau, et al., 2015), the sensor relocates from the  
649 nucleus to the cytoplasm upon phosphorylation by Fus3 or Kss1, and the cytoplasmic to nuclear

650 ratio of the sensor reflects the MAPK activity. We used the coefficient of variation (CV) of pixel  
651 intensities measured from maximum projection images to approximate the nuclear to  
652 cytoplasmic ratio of the probe. The CV was quite variable from cell to cell, but that variability  
653 could be limited by normalization. To approximate MAPK activity ( $m_t$ ), an elliptical ROI was  
654 drawn around each cell at each time point using ROI\_TOI\_QUANT\_V8. CV was measured for  
655 each cell for the 60 minutes prior to fusion, and normalized to a minimum of zero and  
656 maximum of 1. Because CV falls as MAPK activity rises, activity was scored as:

$$657 \quad m_t = 1 - \frac{CV_t - CV_{min}}{CV_{max} - CV_{min}}$$

## 658 **Analysis of receptor distribution**

659 Membrane distribution of Ste2-sfGFP and Bem1-tdTomato were measured from medial plane  
660 fluorescent images. Using FIJI software, fluorescence intensity was averaged across the width of  
661 a 3-pixel-wide line tracing the membrane of each cell, drawn with the freehand tool. For  
662 comparison of peak location (Fig. 6E; Fig. 8F) the values for individual linescans were  
663 normalized by subtracting the background fluorescence, dividing by the maximum point in the  
664 linescan, and multiplying by 100 get the %-maximum value. For comparison of receptor  
665 uniformity (Fig. 6C; Fig. 7B) the values of individual linescans were normalized by subtracting  
666 the background, and bringing each cell to an integral of 1. To generate average distributions,  
667 splines were fit to each Ste2 linescan using the smooth.spline function in R, with a 0.75  
668 smoothing factor. The normalized curves for Ste2 or Bem1 from the previous step were then  
669 centered on the maximum from the Ste2 spline fit and averaged.

## 670 **Halo assays of pheromone sensitivity**

671 Cells were grown to mid-log-phase ( $OD_{600} \approx 0.4$ ) at 30°C overnight in YEPD (1% yeast extract,  
672 2% peptone, 2% dextrose). Cultures were diluted to  $2.5 \times 10^5$  cells/mL, and  $5 \times 10^4$  cells were  
673 spread on YEPD plates in triplicate using sterile glass beads. Plates were allowed to dry for  
674 several minutes, and then 2  $\mu$ L of 1 mM, 500  $\mu$ M, and 100  $\mu$ M  $\alpha$ -factor was spotted in three  
675 separate spots on each plate. Plates were incubated for 48 h at 30°C, and then images were  
676 taken using a Bio-Rad Gel Doc XR+ system. Using FIJI software, circles were fit to the zone of  
677 arrest surrounding each  $\alpha$ -factor spot, and the diameter of the circles was measured in pixels.

## 678 **Immunoblotting**

679 Cell cultures were grown in triplicate overnight to mid-log phase in YEPD.  $10^7$  cells were  
680 collected by centrifugation, and protein was extracted by TCA precipitation as described  
681 (Keaton et al., 2008). Electrophoresis and Western blotting were performed as described (Bose  
682 et al. 2001). Polyclonal anti-Cdc11 antibodies (Santa Cruz Biotechnology, Inc.) were used at  
683 1:5000 dilution and monoclonal mouse anti-GFP antibodies (Roche) were used at 1:2000  
684 dilution. Fluorophore conjugated secondary antibodies against mouse (IRDye 800CW goat anti-  
685 mouse IgG, LI-COR) and rabbit (Alexa Fluor 680 goat anti-rabbit IgG, Invitrogen) antibodies were  
686 used at 1:10000 dilution. Blots were visualized and quantified with the ODYSSEY imaging  
687 system (LI-COR). All values were normalized to a Cdc11 loading control.

## 688 **Statistical analysis**



689 t-Tests were performed in Microsoft Excel via the “t-Test: Two-Sample Assuming Unequal  
690 Variances” function (Fig. 7 C, D, Fig. 8C). Two-sample Kolmogorov-Smirnov tests were  
691 performed using the Real Statistics Resource Pack software (Release 5.4, developed by Charles  
692 Zaiontz) Add-in for Microsoft Excel (Fig. 2D, Fig. 5A-D, Fig. 7F, Fig. 8D, E). p-values over 0.05  
693 were reported as “not significant,” and p-values under 0.05 were reported as “ $p < 0.05$ .”

694

## 695 **Figure Legends**

696

### 697 **Figure 1. Mating yeast display distinct indecisive and committed stages of polarity behavior.**

698 **(A)** Localization of Bem1-GFP in a representative mating cell. Top: Inverted maximum z-  
699 projection images of Bem1-GFP at selected time points, with birth (cytokinesis) designated as 0  
700 min. A weak Bem1 cluster appears 4 min (blue box,  $T_{ic}$  – time of initial clustering). The cluster  
701 moves and fluctuates in intensity during an “indecisive phase” until 38 min (orange box,  $T_p$  –  
702 time of polarization), when it strengthens and remains stationary during a “committed phase”  
703 until fusion occurs at 54 min. Bottom: quantification of Bem1 clustering in the same cell (see  
704 methods). **(B)** Bem1 clustering in 10 representative mating cells as in (A). In this panel, the time  
705 of fusion was designated as 0 min and the timeline extends back to the time of cell birth. Color  
706 switches from blue to orange at  $T_p$ . **(C)** Localization of Bem1-GFP and Spa2-mCherry in a mating  
707 cell from birth (-82 min) to fusion (0 min). Top: Inverted maximum z-projection images of the  
708 indicated probes. Bottom: quantification of Bem1 and Spa2 clustering in the same cell. **(D)** Spa2  
709 clustering in 10 representative cells, displayed as in (B). **(E)** The cumulative distribution ( $n=150$ )  
710 of the interval between birth and  $T_{ic}$  in mating cells. **(F)** Localization of Bem1-tdTomato in a  
711 “serial dating” cell. Inverted maximum z-projection images of selected time points displaying a  
712 MAT $\alpha$  cell transiently orienting polarity towards 4 different MAT $\alpha$  cells before committing to  
713 the 1st. The MAT $\alpha$  cell is circled in blue, and each sequential partner is circled in orange. **(G)** The  
714 cumulative distribution ( $n=150$ ) of the duration of the indecisive phase (blue) and the  
715 committed phase (orange). Dashed lines indicate median. Scale bar, 3  $\mu$ m. Strains: DLY12943,  
716 DLY7593 (A, B, E-G), DLY21379 (C,D).

717

718 **Figure 2. Synchronous commitment by both partners. (A)** Two hypotheses for polarization  
719 timing in mating partners that “meet” when they are in different stages of the cell cycle. Top:  
720 The first-born cell (blue) locates the partner (orange) while the latter is still completing the cell  
721 cycle. The first-born cell polarizes and waits during an extended committed phase for its  
722 partner to catch up. Bottom: The first-born cell cannot locate its partner until the partner  
723 enters G1 phase. It remains in an extended indecisive phase until the partner enters G1, after  
724 which both cells locate one another and polarize simultaneously. **(B)** Cumulative distribution of  
725 the interval between stable polarization and fusion (i.e. duration of the committed phase) in  
726 first-born (blue,  $n=46$ ) and second-born cells (orange,  $n=104$ ). **(C)** Cumulative distribution of the  
727 interval between when the first-born cell polarizes and when the second-born cell polarizes (i.e.  
728  $T_{p2} - T_{p1}$ ) ( $n=104$ ). **(D)** Cumulative distribution of the interval between initial clustering and  
729 commitment (i.e. duration of the indecisive phase) in first-born (blue,  $n=46$ ) and second-born  
730 cells (orange,  $n=104$ ) (\* two sample Kolmogorov-Smirnov [KS] test,  $p < 0.05$ ). **(E)** Pheromone  
731 synthesis is high in G1 and decreases as cells enter the cell cycle. Cells harboring the reporter

732 sfGFP under control of the MF $\alpha$ 1 promoter were imaged for 150 min at 2 min resolution.  
733 Reporter fluorescence was normalized to the value at the time of first bud emergence. Bud  
734 emergence designated as 0 min. Curves were colored orange from birth to bud emergence (G1  
735 phase), and blue from bud emergence to birth (S, G2, and M phase). Dashed lines indicate  
736 median (B-D) or times of bud emergence (E). Strains: DLY12943, DLY7593 (B-D), DLY22883 (E).

737

738

739 **Figure 3. Commitment coincides with an increase in MAPK activity.** (A) Localization of MAPK  
740 activity sensor varies through the cell cycle. Inverted maximum z-projection images of the  
741 sensor Ste7<sub>1-33</sub>-NLS-NLS-mCherry in two representative vegetatively growing cells. (B) The  
742 sensor is exported from the nucleus in response to MAPK activation. MAT $\alpha$  cells harboring  
743 Ste7<sub>1-33</sub>-NLS-NLS-mCherry were mixed with MAT $\alpha$  cells and imaged as in (A). Two  
744 representative mating cells illustrated from birth to fusion (0 min = fusion). (C) MAPK activity  
745 calculated from sensor distribution (see methods) in the 60 min prior to fusion. The transition  
746 from the indecisive phase (blue) to the committed phase (orange) was determined from a Spa2-  
747 GFP probe in the same cells. (D) Top: MAPK activity (blue, as in C) and Spa2 clustering (orange,  
748 as in Fig. 1F) in a representative mating cell. Bottom: six other cells plotted as above. (E)  
749 Average MAPK activity (blue) and Spa2 clustering (orange) during the 60 min prior to fusion  
750 (n=23 cells). Shaded regions represent standard deviations. (F) Cross-covariance of MAPK  
751 activity and Spa2 clustering during the indecisive phase (window from 60 minutes before fusion  
752 to 30 minutes before fusion) in mating cells (n=23 cells). Lag represents the time by which the  
753 Spa2 clustering data was shifted forward in time relative to the MAPK activity data. 1 = perfect  
754 cross-covariance (i.e. auto-covariance = 1 when lag = 0) (G) Cells harboring P<sub>gal</sub>-Ste5-CTM allow  
755 MAPK induction by  $\beta$ -estradiol without pheromone treatment. The MAPK sensor Ste7<sub>1-33</sub>-NLS-  
756 NLS-mCherry and Spa2-GFP were imaged following  $\beta$ -estradiol treatment and inverted  
757 maximum z-projection images of selected time points showing Spa2 neck localization during  
758 cytokinesis, indecisive behavior upon intermediate MAPK activation, and committed behavior  
759 following high MAPK activation in two representative cells. Scale bar, 3  $\mu$ m. Strains: DLY22259  
760 (A-F), DLY22764 (G).

761

762 **Figure 4. Secretory vesicles colocalize with the polarity cluster.** (A) Hypothesized pheromone  
763 secretion during indecisive (left) and committed (right) phases. When clusters are adjacent,  
764 local pheromone concentration would be higher, triggering commitment. (B) MAT $\alpha$  cells  
765 harboring Bem1-tdTomato and the secretory vesicle marker GFP-Sec4 were mixed with MAT $\alpha$   
766 cells and imaged as in Fig. 1A. Inverted maximum z-projection images at 8 min intervals show  
767 colocalization of Bem1 and Sec4 during the indecisive phase. Scale bar, 3  $\mu$ m. Strain: DLY13771.

768

769 **Figure 5. Non-random initial clustering of polarity factors.** (A) Orientation with respect to  
770 partner. Left: cumulative distribution of initial Bem1 cluster location (angle) relative to the  
771 mating partner (n=150). 0 degrees = cluster formation directly adjacent to eventual mating  
772 partner, as shown in inset. Black line: hypothetical random distribution (\* KS test, p < 0.05).  
773 Right: polar histogram displaying the same data. (B) Orientation with respect to neck. Left:  
774 cumulative distribution of initial cluster location relative to the site of cytokinesis (n=150, KS

775 test, not significant). Right: polar histogram displaying the same data. (C) Left: cumulative  
776 distribution of initial cluster location relative to the mating partner, plotted separately for first-  
777 born (blue, n=46) and second born (orange, n=104) cells (two sample KS test, not significant).  
778 Right: polar histogram of the same data. (D) Cumulative distribution of the duration of the  
779 indecisive phase in second-born cells, plotted separately for cells in which the initial cluster  
780 formed within  $60^\circ$  of the mating partner ( $\theta < 60$ , orange, n=66), and cells in which the initial  
781 cluster formed greater than  $60^\circ$  from the partner ( $\theta > 60$ , blue, n=38)(\* two sample KS test,  $p <$   
782 0.05). Inset: diagram displaying the two groups of cells. Strain: DLY12943, DLY7593.  
783

784 **Figure 6. Pheromone receptor distribution prior to pheromone exposure.** (A) Single-plane  
785 inverted image of vegetatively growing cells expressing Ste2-sfGFP. Membrane signal (blue  
786 arrow) is Ste2-sfGFP, but vacuole signal (orange arrow) is probably sfGFP cleaved from Ste2-  
787 sfGFP after internalization. (B) Time series of two representative cells displaying the Ste2  
788 distribution through the cell cycle. (C) Left: Representative G1 cells displaying Ste2 distributions  
789 ranging from almost uniform (top left) to very asymmetric (bottom right). Right: quantification  
790 of Ste2-sfGFP membrane distribution in G1 cells. Individual linescans (examples in blue) were  
791 normalized to have the same total fluorescence and centered based on the maximum of a  
792 smoothed spline fit. Black line, average (n=71). (D) Initial Bem1 clusters sometimes form in  
793 areas depleted of receptor. Single-plane Ste2-sfGFP images (left), maximum projection Bem1-  
794 tdTomato images (middle), and both overlaid (right, Bem1 = magenta, Ste2 = green, both =  
795 white) from three example cells at the time of initial clustering. (E) Bem1 initial cluster  
796 formation is random with respect to Ste2 distribution. Left: averaged Ste2-sfGFP distribution  
797 (shaded region, standard deviation) at the time of initial clustering (n=33). Right: averaged  
798 Bem1-tdTomato distribution at the time of initial clustering, centered on the peak of the Ste2-  
799 sfGFP distribution (n=33). Bem1 linescans acquired from maximum projection images of the  
800 same cells. Scale bar, 3  $\mu\text{m}$ . Strains: DLY20713 (A-C), DLY22243 (D, E).

801  
802 **Figure 7. Effect of receptor distribution on the accuracy of initial clustering.** (A) Single-plane  
803 inverted images of Ste2-sfGFP (top), Ste2<sup>NPF</sup>-sfGFP (middle), and Ste2<sup>7XR-GPAAD</sup>-sfGFP (bottom) in  
804 representative G1 cells. Ste2<sup>7XR-GPAAD</sup>-sfGFP displayed much stronger fluorescence. As a result,  
805 the brightness and contrast of the Ste2<sup>7XR-GPAAD</sup>-sfGFP images have been scaled differently for  
806 clear visibility. (B) Average Ste2 membrane distribution, quantified as in Fig. 6C, in G1 cells with  
807 Ste2-sfGFP (blue), Ste2<sup>NPF</sup>-sfGFP (orange), and Ste2<sup>7XR-GPAAD</sup>-sfGFP (green). (C) Ste2-sfGFP  
808 abundance. Left: representative Western blot.  $\alpha$ -GFP antibodies label two bands – full-length  
809 Ste2-sfGFP and vacuolar sfGFP (note absence of vacuole signal for Ste2<sup>7XR-GPAAD</sup>). Right:  
810 quantification of full-length Ste2 abundance (n=3 biological replicates, normalized to the  
811 average abundance of wild-type Ste2). (D) Halo assay for pheromone sensitivity of cells with  
812 wild-type Ste2 (blue), Ste2<sup>NPF</sup> (orange), and Ste2<sup>7XR-GPAAD</sup> (green). Top: images of representative  
813 halos. Bottom: quantification of halo diameter (n=9, 3 technical replicates at 3 pheromone  
814 concentrations, normalized to the average wild-type halo diameter; \* t test,  $p < 0.05$ ). (E)  
815 Cumulative distribution of the duration of the indecisive phase for MAT $\alpha$  cells that were born  
816 immediately adjacent to a MAT $\alpha$  partner in G1, and either budded or mated by the end of the  
817 movie. Cells harboring Ste2 (blue, n=71), Ste2<sup>NPF</sup> (orange, n=53), or Ste2<sup>7XR-GPAAD</sup> (green, n=47).  
818 (F) Left: Cumulative distribution of initial Bem1 cluster orientation relative to the nearest

819 potential mating partner for MAT $\alpha$  cells born immediately adjacent to a MAT $\alpha$  cell in G1. Cells  
820 with wild-type Ste2 (blue, n=117), Ste2<sup>NPF</sup> (orange, n=78, not significant), or Ste2<sup>7XR-GPAAD</sup> (green,  
821 n=79, not significant). Right: polar histograms of the same data. Strains: DLY20713, DLY20715,  
822 DLY21705 (A, B), DLY21203, DLY21206, DLY21704 (C), DLY22321, DLY21301, DLY21295 (D),  
823 DLY12943, DLY22058, DLY22397 (E, F).

824  
825 **Figure 8. Ratiometric sensing allows cells to orient towards partners despite uneven receptor**  
826 **density. (A)** Proposed ratiometric pheromone sensing mechanism. Left: G $\alpha$  is activated by  
827 pheromone-bound receptor (Ste2 +  $\alpha$ -factor), and inactivated by the RGS protein Sst2. Sst2  
828 associates with inactive Ste2. The instantaneous activation state of G $\alpha$  is determined by the  
829 state of the receptor with which it last interacted. Right: G $\alpha$  switches between active (green  
830 arrows) and inactive (red arrows) states when it interacts with active (green circles) and inactive  
831 (red circles) receptors. The fraction of the local G $\alpha$  that is active reflects the ratio of active to  
832 inactive receptors, regardless of receptor density. This means differences in pheromone level at  
833 different points on the cell surface can be compared even if there are differences in receptor  
834 density. **(B)** hsRGS4 is distributed uniformly on the membrane. Single-plane inverted image of  
835 hsRGS4-CFP. **(C)** Pheromone sensitivity measured via halo assay in wild-type cells (blue), and  
836 cells in which Sst2 has been replaced by one copy (gray, hsRGS4, \* t test, p < 0.05) or two copies  
837 (red, hsRGS4x2, not significant) of hsRGS4 (n=9, 3 technical replicates at 3 pheromone  
838 concentrations, normalized to the average wild type halo diameter). **(D)** Left: Cumulative  
839 distribution of the location of initial Bem1 cluster orientation relative to the nearest potential  
840 mating partner in wild type cells (blue, n=117), hsRGS4x2 cells (red, n=85, \* two sample KS test,  
841 p < 0.05), and hsRGS4x2 cells harboring Ste2<sup>7XR-GPAAD</sup> (uniform receptor, green, n=65, not  
842 significant). Right: polar histogram of the same data for hsRGS4 strains. **(E)** Left: Cumulative  
843 distribution of the location of initial Bem1 cluster formation relative to the site of cytokinesis in  
844 wild type cells (blue, n=117), hsRGS4x2 cells (red, n=85, \* two sample KS test, p < 0.05), and  
845 hsRGS4x2 cells harboring Ste2<sup>7XR-GPAAD</sup> (uniform receptor, green, n=65, not significant). Right:  
846 The same data represented as a polar histogram (WT not plotted). **(F)** Bem1 initial cluster  
847 location is biased by Ste2 distribution in hsRGS4x2 cells. Average Bem1 distribution at the time  
848 of initial clustering relative to Ste2 maximum, plotted as in Fig. 6E (n=33). Scale bar, 3  $\mu$ m.  
849 Strains: DLY22318 (B, C), DLY22321, DLY22520 (C-F), DLY12943, DLY22606 (D-F).

850  
851 **Figure S1. MAPK sensor normalization.** Cells harboring Ste7<sub>1-33</sub>-NLS-NLS-mCherry were imaged  
852 for 150 min with 2 min resolution. **(A)** Coefficient of variation (CV) of Ste7<sub>1-33</sub>-NLS-NLS-mCherry,  
853 measured from maximum projection images in a region of interest encompassing the full cell.  
854 Time was normalized to “% cell cycle,” with the first cytokinesis for each cell aligned at 0, and  
855 the second cytokinesis aligned at 100. **(B)** Maximum (blue) and minimum (orange) CV vs mean  
856 fluorescence intensity for each cell in (A). Mean fluorescence intensity was measured in the  
857 same region of interest as CV, and averaged across all time points for each cell. **(C)** Normalized  
858 CV, plotted as in (A). CV was normalized to 0 and 1 at the minimum and maximum CV for each  
859 cell. Strains: DLY22259 (A-C).

860  
861 **Figure S2. Bem1 polarization in Ste2<sup>NPF</sup> cells that failed to mate.** Cells with faster pheromone  
862 receptor endocytosis sometimes bud instead of mating with available partners. MAT $\alpha$  cells

863 harboring Bem1-GFP and Ste2<sup>NPF</sup> were mixed with MAT $\alpha$  cells harboring Bem1-tdTomato and  
864 imaged immediately. (A) Time series of maximum projection images of Bem1-GFP polarization  
865 in three MAT $\alpha$  cells (blue circles) harboring Ste2<sup>NPF</sup> that failed to mate with adjacent G1 MAT $\alpha$   
866 cells (orange circles). Red arrows indicate bud emergence. 60 min, 6 min interval, birth = 0 min,  
867 scale bar, 3  $\mu$ m. Strains: DLY22058.

868  
869 **Video 1. Bem1 polarization in a mating mixture.** Cells harboring Bem1-GFP (MAT $\alpha$ ) and Bem1-  
870 tdTomato (MAT $\alpha$ ) were mixed on an agarose slab and immediately imaged. (Left) False color  
871 movie of maximum projection fluorescent images of Bem1-GFP (green) and Bem1-tdTomato  
872 (magenta) in a typical mating mixture. (Right) the same movie in inverted grayscale, with labels  
873 for budding cells (red dots), G1 phase  $\alpha$  cells (green dots), G1 phase  $\alpha$  cells (teal dots), and  
874 zygotes (circled in blue). 118 min with 2 min interval between frames. Strains: DLY12943,  
875 DLY7593.

876  
877 **Video 2. Bem1 and Spa2 polarization in mating cells.** MAT $\alpha$  cells harboring both Bem1-GFP and  
878 Spa2-mCherry were mixed with wildtype MAT $\alpha$  cells and immediately imaged. (Top) Maximum  
879 projection fluorescent images of Bem1-GFP polarization in 3 example cells from cytokinesis  
880 (frame 1) through fusion with a mating partner. (Bottom) Spa2-mCherry polarization in the  
881 same three cells. 100 min with 2 min interval between frames. Strains: DLY21379.

882  
883 **Video 3. MAPK sensor in cycling cells.** The nuclear to cytoplasmic ratio of the MAPK sensor  
884 fluctuates through the cell cycle, rising during cytokinesis, and falling during bud growth.  
885 Fluorescent images of a field of cells harboring Ste7<sub>1-33</sub>-NLS-NLS-mCherry. 150 min with 2 min  
886 interval between frames. Strains: DLY22259.

887  
888 **Video 4. MAPK sensor in mating cells.** MAPK activity rises (i.e. nuclear to cytoplasmic ratio of  
889 the MAPK sensor *falls*) as cells prepare to mate. Fluorescent images of 3 mating type  $\alpha$  cells  
890 harboring Ste7<sub>1-33</sub>-NLS-NLS-mCherry, mating with wildtype mating type  $\alpha$  cells. 80 min with 2  
891 min interval between frames. Fusion occurs in the final frame for all mating pairs. Strains:  
892 DLY22259.



## 893 **References**

894

- 895 Achstetter, T. (1989). Regulation of alpha-factor production in *Saccharomyces cerevisiae*: a-  
896 factor pheromone-induced expression of the MF alpha 1 and STE13 genes. *Mol Cell Biol* 9,  
897 4507-14.
- 898 Alvarez, L., Friedrich, B.M., Gompper, G., and Kaupp, U.B. (2014). The computational sperm cell.  
899 *Trends Cell Biol* 24, 198-207.
- 900 Arkowitz, R.A. (2009). Chemical gradients and chemotropism in yeast. *Cold Spring Harb*  
901 *Perspect Biol* 1, a001958.
- 902 Ayscough, K.R., and Drubin, D.G. (1998). A role for the yeast actin cytoskeleton in pheromone  
903 receptor clustering and signalling. *Curr Biol* 8, 927-30.
- 904 Bajaj, A., Celic, A., Ding, F.X., Naider, F., Becker, J.M., and Dumont, M.E. (2004). A fluorescent  
905 alpha-factor analogue exhibits multiple steps on binding to its G protein coupled receptor in  
906 yeast. *Biochemistry* 43, 13564-78.
- 907 Ballon, D.R., Flanary, P.L., Gladue, D.P., Konopka, J.B., Dohlman, H.G., and Thorner, J. (2006).  
908 DEP-domain-mediated regulation of GPCR signaling responses. *Cell* 126, 1079-93.
- 909 Bendezu, F.O., and Martin, S.G. (2013). Cdc42 explores the cell periphery for mate selection in  
910 fission yeast. *Curr Biol* 23, 42-7.
- 911 Berg, H.C., and Purcell, E.M. (1977). Physics of chemoreception. *Biophys J* 20, 193-219.
- 912 Bi, E., and Park, H.O. (2012). Cell polarization and cytokinesis in budding yeast. *Genetics* 191,  
913 347-87.
- 914 Bi, E., and Pringle, J.R. (1996). ZDS1 and ZDS2, genes whose products may regulate Cdc42p in  
915 *Saccharomyces cerevisiae*. *Mol Cell Biol* 16, 5264-75.
- 916 Bush, A., Vasen, G., Constantinou, A., Dunayevich, P., Patop, I.L., Blaustein, M., and Colman-  
917 Lerner, A. (2016). Yeast GPCR signaling reflects the fraction of occupied receptors, not the  
918 number. *Mol Syst Biol* 12.
- 919 Butty, A.C., Pryciak, P.M., Huang, L.S., Herskowitz, I., and Peter, M. (1998). The role of Far1p in  
920 linking the heterotrimeric G protein to polarity establishment proteins during yeast mating.  
921 *Science* 282, 1511-6.
- 922 Chen, H., Kuo, C.C., Kang, H., Howell, A.S., Zyla, T.R., Jin, M., and Lew, D.J. (2012). Cdc42p  
923 regulation of the yeast formin Bni1p mediated by the effector Gic2p. *Mol Biol Cell* 23, 3814-26.
- 924 Chiou, J., Balasubramanian, M.K., and Lew, D.J. (2017). Cell Polarity in Yeast. *Annu Rev Cell Dev*  
925 *Biol* 33, 77-101.
- 926 Chiou, J.G., Ramirez, S.A., Elston, T.C., Witelski, T.P., Schaeffer, D.G., and Lew, D.J. (2018).  
927 Principles that govern competition or co-existence in Rho-GTPase driven polarization. *PLoS*  
928 *Comput Biol* 14.
- 929 Chou, C.S., Nie, Q., and Yi, T.M. (2008). Modeling robustness tradeoffs in yeast cell polarization  
930 induced by spatial gradients. *PLoS One* 3, e3103.
- 931 Durandau, E., Aymoz, D., and Pelet, S. (2015). Dynamic single cell measurements of kinase  
932 activity by synthetic kinase activity relocation sensors. *BMC Biol* 13, 55.
- 933 Dyer, J.M., Savage, N.S., Jin, M., Zyla, T.R., Elston, T.C., and Lew, D.J. (2013). Tracking shallow  
934 chemical gradients by actin-driven wandering of the polarization site. *Curr Biol* 23, 32-41.

935 Evangelista, M., Blundell, K., Longtine, M.S., Chow, C.J., Adames, N., Pringle, J.R., Peter, M., and  
936 Boone, C. (1997). Bni1p, a yeast formin linking cdc42p and the actin cytoskeleton during  
937 polarized morphogenesis. *Science* 276, 118-22.

938 Fujiwara, T., Tanaka, K., Mino, A., Kikyo, M., Takahashi, K., Shimizu, K., and Takai, Y. (1998).  
939 Rho1p-Bni1p-Spa2p interactions: implication in localization of Bni1p at the bud site and  
940 regulation of the actin cytoskeleton in *Saccharomyces cerevisiae*. *Mol Biol Cell* 9, 1221-33.

941 Gordon, A., Colman-Lerner, A., Chin, T.E., Benjamin, K.R., Yu, R.C., and Brent, R. (2007). Single-  
942 cell quantification of molecules and rates using open-source microscope-based cytometry.  
943 *Nature Methods* 4, 175.

944 Govindan, B., Bowser, R., and Novick, P. (1995). The role of Myo2, a yeast class V myosin, in  
945 vesicular transport. *J Cell Biol* 128, 1055-68.

946 Hegemann, B., and Peter, M. (2017). Local sampling paints a global picture: Local concentration  
947 measurements sense direction in complex chemical gradients. *Bioessays* 39.

948 Hegemann, B., Unger, M., Lee, S.S., Stoffel-Studer, I., van den Heuvel, J., Pelet, S., Koepl, H.,  
949 and Peter, M. (2015). A Cellular System for Spatial Signal Decoding in Chemical Gradients. *Dev*  
950 *Cell* 35, 458-70.

951 Hicke, L., and Riezman, H. (1996). Ubiquitination of a yeast plasma membrane receptor signals  
952 its ligand-stimulated endocytosis. *Cell* 84, 277-87.

953 Hicke, L., Zanolari, B., and Riezman, H. (1998). Cytoplasmic tail phosphorylation of the alpha-  
954 factor receptor is required for its ubiquitination and internalization. *J Cell Biol* 141, 349-58.

955 Howell, A.S., Jin, M., Wu, C.F., Zyla, T.R., Elston, T.C., and Lew, D.J. (2012). Negative feedback  
956 enhances robustness in the yeast polarity establishment circuit. *Cell* 149, 322-33.

957 Iizuka, R., Yamagishi-Shirasaki, M., and Funatsu, T. (2011). Kinetic study of de novo  
958 chromophore maturation of fluorescent proteins. *Anal Biochem* 414, 173-8.

959 Insall, R. (2013). The interaction between pseudopods and extracellular signalling during  
960 chemotaxis and directed migration. *Curr Opin Cell Biol* 25, 526-31.

961 Ismael, A., and Stone, D.E. (2017). Yeast chemotropism: A paradigm shift in chemical gradient  
962 sensing. *Cell Logist* 7, e1314237.

963 Ismael, A., Tian, W., Waszczak, N., Wang, X., Cao, Y., Suchkov, D., Bar, E., Metodiev, M.V., Liang,  
964 J., Arkowitz, R.A., et al. (2016). Gbeta promotes pheromone receptor polarization and yeast  
965 chemotropism by inhibiting receptor phosphorylation. *Sci Signal* 9, ra38.

966 Janetopoulos, C., Jin, T., and Devreotes, P. (2001). Receptor-mediated activation of  
967 heterotrimeric G-proteins in living cells. *Science* 291, 2408-11.

968 Jenness, D.D., Burkholder, A.C., and Hartwell, L.H. (1986). Binding of alpha-factor pheromone to  
969 *Saccharomyces cerevisiae* cells: dissociation constant and number of binding sites. *Mol Cell*  
970 *Biol* 6, 318-20.

971 Jenness, D.D., and Spatrick, P. (1986). Down regulation of the alpha-factor pheromone receptor  
972 in *S. cerevisiae*. *Cell* 46, 345-53.

973 Jin, T., Zhang, N., Long, Y., Parent, C.A., and Devreotes, P.N. (2000). Localization of the G protein  
974 betagamma complex in living cells during chemotaxis. *Science* 287, 1034-6.

975 Johnson, J.M., Jin, M., and Lew, D.J. (2011). Symmetry breaking and the establishment of cell  
976 polarity in budding yeast. *Curr Opin Genet Dev* 21, 740-6.

977 Khmelinskii, A., Keller, P.J., Bartosik, A., Meurer, M., Barry, J.D., Mardin, B.R., Kaufmann, A.,  
978 Trautmann, S., Wachsmuth, M., Pereira, G., et al. (2012). Tandem fluorescent protein timers for  
979 in vivo analysis of protein dynamics. *Nat Biotechnol* 30, 708-14.  
980 Kozubowski, L., Saito, K., Johnson, J.M., Howell, A.S., Zyla, T.R., and Lew, D.J. (2008). Symmetry-  
981 breaking polarization driven by a Cdc42p GEF-PAK complex. *Curr Biol* 18, 1719-26.  
982 Kuo, C.C., Savage, N.S., Chen, H., Wu, C.F., Zyla, T.R., and Lew, D.J. (2014). Inhibitory GEF  
983 phosphorylation provides negative feedback in the yeast polarity circuit. *Curr Biol* 24, 753-9.  
984 Lai, H., Chiou, J.G., Zhurikhina, A., Zyla, T.R., Tsygankov, D., and Lew, D.J. (2018). Temporal  
985 regulation of morphogenetic events in *Saccharomyces cerevisiae*. *Mol Biol Cell*, mbcE18030188.  
986 Lakhani, V., and Elston, T.C. (2017). Testing the limits of gradient sensing. *PLoS Comput Biol* 13,  
987 e1005386.  
988 Liu, W., Santiago-Tirado, F.H., and Bretscher, A. (2012). Yeast formin Bni1p has multiple  
989 localization regions that function in polarized growth and spindle orientation. *Mol Biol Cell* 23,  
990 412-22.  
991 Longtine, M.S., McKenzie, A., 3rd, Demarini, D.J., Shah, N.G., Wach, A., Brachat, A., Philippsen,  
992 P., and Pringle, J.R. (1998). Additional modules for versatile and economical PCR-based gene  
993 deletion and modification in *Saccharomyces cerevisiae*. *Yeast* 14, 953-61.  
994 Losev, E., Reinke, C.A., Jellen, J., Strongin, D.E., Bevis, B.J., and Glick, B.S. (2006). Golgi  
995 maturation visualized in living yeast. *Nature* 441, 1002-6.  
996 Matheos, D., Metodiev, M., Muller, E., Stone, D., and Rose, M.D. (2004). Pheromone-induced  
997 polarization is dependent on the Fus3p MAPK acting through the formin Bni1p. *J Cell Biol* 165,  
998 99-109.  
999 McClure, A.W., Minakova, M., Dyer, J.M., Zyla, T.R., Elston, T.C., and Lew, D.J. (2015). Role of  
1000 Polarized G Protein Signaling in Tracking Pheromone Gradients. *Dev Cell* 35, 471-82.  
1001 Merlini, L., Khalili, B., Bendezu, F.O., Hurwitz, D., Vincenzetti, V., Vavylonis, D., and Martin, S.G.  
1002 (2016). Local Pheromone Release from Dynamic Polarity Sites Underlies Cell-Cell Pairing during  
1003 Yeast Mating. *Curr Biol* 26, 1117-25.  
1004 Moore, T.I., Chou, C.S., Nie, Q., Jeon, N.L., and Yi, T.M. (2008). Robust spatial sensing of mating  
1005 pheromone gradients by yeast cells. *PLoS One* 3, e3865.  
1006 Mulholland, J., Wesp, A., Riezman, H., and Botstein, D. (1997). Yeast actin cytoskeleton mutants  
1007 accumulate a new class of Golgi-derived secretory vesicle. *Mol Biol Cell* 8, 1481-99.  
1008 Nern, A., and Arkowitz, R.A. (1998). A GTP-exchange factor required for cell orientation. *Nature*  
1009 391, 195-8.  
1010 Nern, A., and Arkowitz, R.A. (1999). A Cdc24p-Far1p-Gbetagamma protein complex required for  
1011 yeast orientation during mating. *J Cell Biol* 144, 1187-202.  
1012 Pruyne, D., and Bretscher, A. (2000). Polarization of cell growth in yeast. *J Cell Sci* 113 ( Pt 4),  
1013 571-85.  
1014 Pruyne, D., Legesse-Miller, A., Gao, L., Dong, Y., and Bretscher, A. (2004). Mechanisms of  
1015 polarized growth and organelle segregation in yeast. *Annu Rev Cell Dev Biol* 20, 559-91.  
1016 Pryciak, P.M., and Huntress, F.A. (1998). Membrane recruitment of the kinase cascade scaffold  
1017 protein Ste5 by the Gbetagamma complex underlies activation of the yeast pheromone  
1018 response pathway. *Genes Dev* 12, 2684-97.  
1019 Raths, S.K., Naider, F., and Becker, J.M. (1988). Peptide analogues compete with the binding of  
1020 alpha-factor to its receptor in *Saccharomyces cerevisiae*. *J Biol Chem* 263, 17333-41.

- 1021 Schandel, K.A., and Jenness, D.D. (1994). Direct evidence for ligand-induced internalization of  
1022 the yeast alpha-factor pheromone receptor. *Mol Cell Biol* 14, 7245-55.
- 1023 Segall, J.E. (1993). Polarization of yeast cells in spatial gradients of alpha mating factor. *Proc*  
1024 *Natl Acad Sci U S A* 90, 8332-6.
- 1025 Sheu, Y.J., Santos, B., Fortin, N., Costigan, C., and Snyder, M. (1998). Spa2p interacts with cell  
1026 polarity proteins and signaling components involved in yeast cell morphogenesis. *Mol Cell Biol*  
1027 18, 4053-69.
- 1028 Sikorski, R.S., and Hieter, P. (1989). A system of shuttle vectors and yeast host strains designed  
1029 for efficient manipulation of DNA in *Saccharomyces cerevisiae*. *Genetics* 122, 19-27.
- 1030 Singh, A., Chen, E.Y., Lugovoy, J.M., Chang, C.N., Hitzeman, R.A., and Seeburg, P.H. (1983).  
1031 *Saccharomyces cerevisiae* contains two discrete genes coding for the alpha-factor pheromone.  
1032 *Nucleic Acids Res* 11, 4049-63.
- 1033 Strickfaden, S.C., and Pryciak, P.M. (2008). Distinct roles for two Galpha-Gbeta interfaces in cell  
1034 polarity control by a yeast heterotrimeric G protein. *Mol Biol Cell* 19, 181-97.
- 1035 Suchkov, D.V., DeFlorio, R., Draper, E., Ismael, A., Sukumar, M., Arkowitz, R., and Stone, D.E.  
1036 (2010). Polarization of the yeast pheromone receptor requires its internalization but not actin-  
1037 dependent secretion. *Mol Biol Cell* 21, 1737-52.
- 1038 Swaney, K.F., Huang, C.H., and Devreotes, P.N. (2010). Eukaryotic Chemotaxis: A Network of  
1039 Signaling Pathways Controls Motility, Directional Sensing, and Polarity. *Annu Rev Biophys* 39,  
1040 265-89.
- 1041 Takahashi, S., and Pryciak, P.M. (2008). Membrane localization of scaffold proteins promotes  
1042 graded signaling in the yeast MAP kinase cascade. *Curr Biol* 18, 1184-91.
- 1043 Tan, P.K., Howard, J.P., and Payne, G.S. (1996). The sequence NPFXD defines a new class of  
1044 endocytosis signal in *Saccharomyces cerevisiae*. *J Cell Biol* 135, 1789-800.
- 1045 Terrell, J., Shih, S., Dunn, R., and Hicke, L. (1998). A function for monoubiquitination in the  
1046 internalization of a G protein-coupled receptor. *Mol Cell* 1, 193-202.
- 1047 Valdez-Taubas, J., and Pelham, H.R. (2003). Slow diffusion of proteins in the yeast plasma  
1048 membrane allows polarity to be maintained by endocytic cycling. *Curr Biol* 13, 1636-40.
- 1049 Valtz, N., Peter, M., and Herskowitz, I. (1995). FAR1 is required for oriented polarization of yeast  
1050 cells in response to mating pheromones. *J Cell Biol* 131, 863-73.
- 1051 Ventura, A.C., Bush, A., Vasen, G., Goldín, M.A., Burkinshaw, B., Bhattacharjee, N., Folch, A.,  
1052 Brent, R., Chernomoretz, A., and Colman-Lerner, A. (2014). Utilization of extracellular  
1053 information before ligand-receptor binding reaches equilibrium expands and shifts the input  
1054 dynamic range. *Proc Natl Acad Sci U S A* 111, E3860-9.
- 1055 von Philipsborn, A., and Bastmeyer, M. (2007). Mechanisms of gradient detection: a  
1056 comparison of axon pathfinding with eukaryotic cell migration. *Int Rev Cytol* 263, 1-62.
- 1057 Walch-Solimena, C., Collins, R.N., and Novick, P.J. (1997). Sec2p mediates nucleotide exchange  
1058 on Sec4p and is involved in polarized delivery of post-Golgi vesicles. *J Cell Biol* 137, 1495-509.
- 1059 Wang, Y., and Dohlman, H.G. (2004). Pheromone signaling mechanisms in yeast: a prototypical  
1060 sex machine. *Science* 306, 1508-9.
- 1061 Wu, C.-F., Chiou, J.-G., Minakova, M., Woods, B., Tsygankov, D., Zyla, T.R., Savage, N.S., Elston,  
1062 T.C., and Lew, D.J. (2015). Role of competition between polarity sites in establishing a unique  
1063 front.

1064 Zheng, Y., Cerione, R., and Bender, A. (1994). Control of the yeast bud-site assembly GTPase  
1065 Cdc42. Catalysis of guanine nucleotide exchange by Cdc24 and stimulation of GTPase activity by  
1066 Bem3. *J Biol Chem* 269, 2369-72.



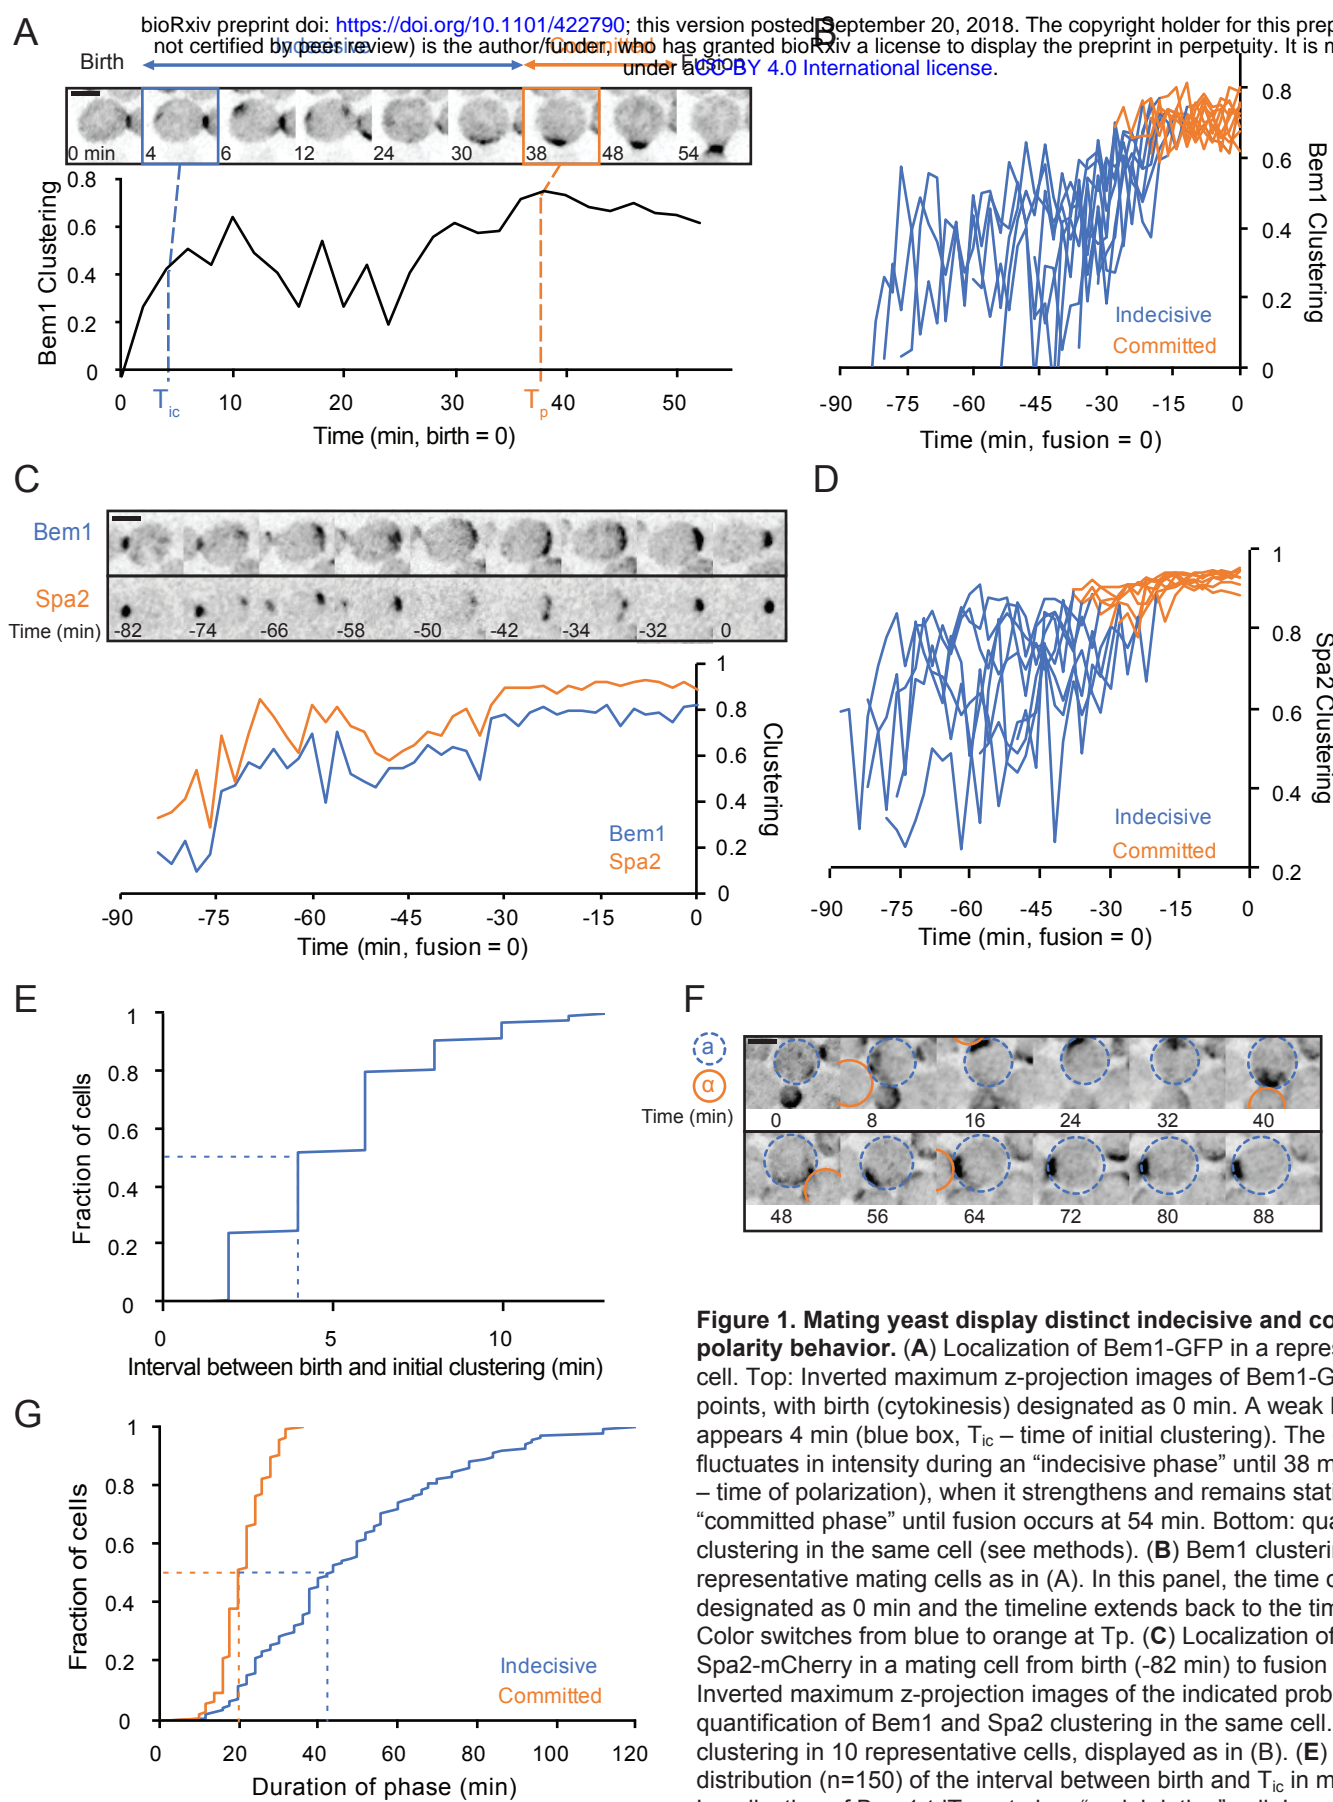

**Figure 1. Mating yeast display distinct indecisive and committed stages of polarity behavior.** (A) Localization of Bem1-GFP in a representative mating cell. Top: Inverted maximum z-projection images of Bem1-GFP at selected time points, with birth (cytokinesis) designated as 0 min. A weak Bem1 cluster appears 4 min (blue box,  $T_{ic}$  – time of initial clustering). The cluster moves and fluctuates in intensity during an “indecisive phase” until 38 min (orange box,  $T_p$  – time of polarization), when it strengthens and remains stationary during a “committed phase” until fusion occurs at 54 min. Bottom: quantification of Bem1 clustering in the same cell (see methods). (B) Bem1 clustering plotted for 10 representative mating cells as in (A). In this panel, the time of fusion was designated as 0 min and the timeline extends back to the time of cell birth. Color switches from blue to orange at  $T_p$ . (C) Localization of Bem1-GFP and Spa2-mCherry in a mating cell from birth (-82 min) to fusion (0 min). Top: Inverted maximum z-projection images of the indicated probes. Bottom: quantification of Bem1 and Spa2 clustering in the same cell. (D) Spa2 clustering in 10 representative cells, displayed as in (B). (E) The cumulative distribution ( $n=150$ ) of the interval between birth and  $T_{ic}$  in mating cells. (F) Localization of Bem1-tdTomato in a “serial dating” cell. Inverted maximum z-projection images of selected time points displaying a MAT $\alpha$  cell transiently orienting polarity towards 4 different MAT $\alpha$  cells before committing to the 1st. The MAT $\alpha$  cell is circled in blue, and each sequential partner is circled in orange. (G) The cumulative distribution ( $n=150$ ) of the duration of the indecisive phase (blue) and the committed phase (orange). Dashed lines indicate median. Scale bar, 3  $\mu$ m. Strains: DLY12943, DLY7593 (A, B, E-G), DLY21379 (C, D).

A

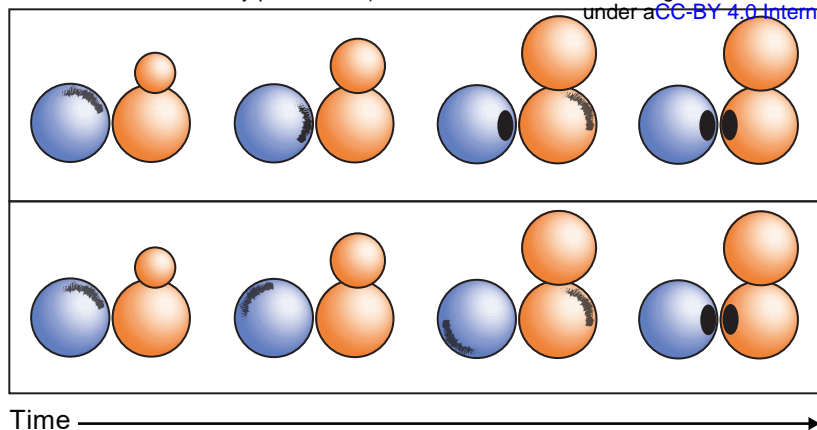

B

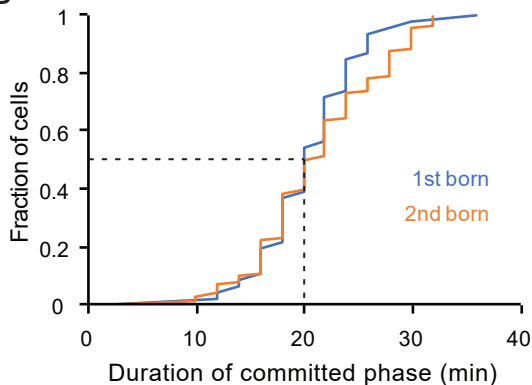

C

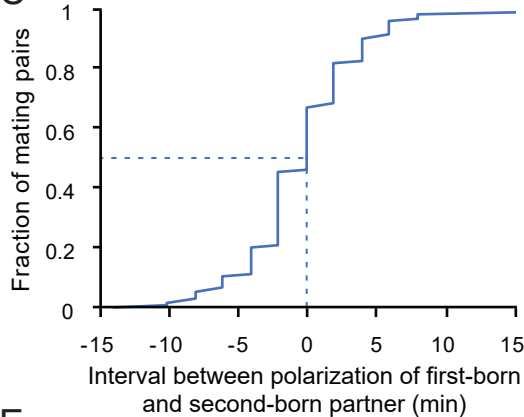

D

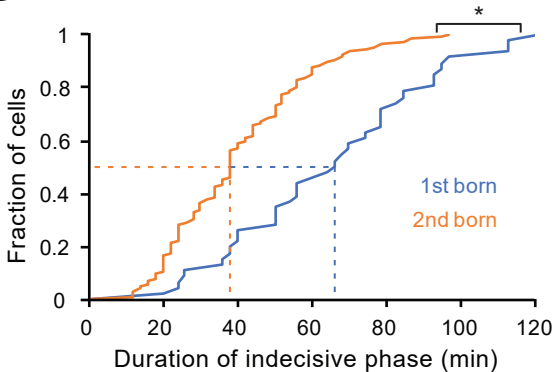

E

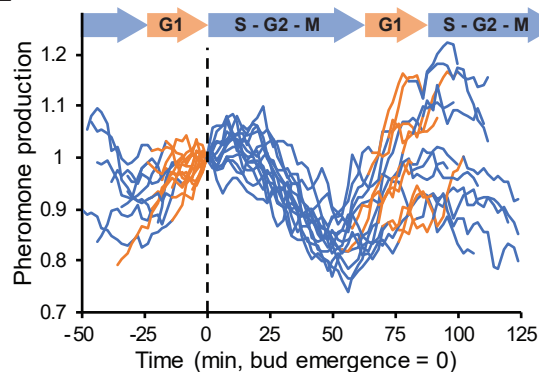

**Figure 2. Synchronous commitment by both partners.** (A) Two hypotheses for polarization timing in mating partners that “meet” when they are in different stages of the cell cycle. Top: The first-born cell (blue) locates the partner (orange) while it is still completing the cell cycle. The first-born cell polarizes and waits during an extended committed phase for its partner to catch up. Bottom: The first-born cell cannot locate its partner until the partner enters G1 phase. It remains in an extended indecisive phase until the partner enters G1, after which both cells locate one another and polarize simultaneously. (B) Cumulative distribution of the interval between stable polarization and fusion (i.e. duration of the committed phase) in first-born (blue, n=46) and second-born cells (orange, n=104). (C) Cumulative distribution of the interval between when the first-born cell polarizes and when the second-born cell polarizes (i.e.  $T_{p2} - T_{p1}$ ) (n=104). (D) Cumulative distribution of the interval between initial clustering and commitment (i.e. duration of the indecisive phase) in first-born (blue, n=46) and second-born cells (orange, n=104) (\* two sample Kolmogorov-Smirnov [KS] test,  $p < 0.05$ ). (E) Pheromone synthesis is high in G1 and decreases as cells enter the cell cycle. Cells harboring the reporter sfGFP under control of the MF $\alpha$ 1 promoter were imaged for 150 min at 2 min resolution. Reporter fluorescence was normalized to the value at the time of first bud emergence. Bud emergence designated as 0 min. Curves were colored orange from birth to bud emergence (G1 phase), and blue from bud emergence to birth (S, G2, and M phase). Dashed lines indicate median (B-D) or times of bud emergence (E). Strains: DLY12943, DLY7593 (B-D), DLY22883 (E).

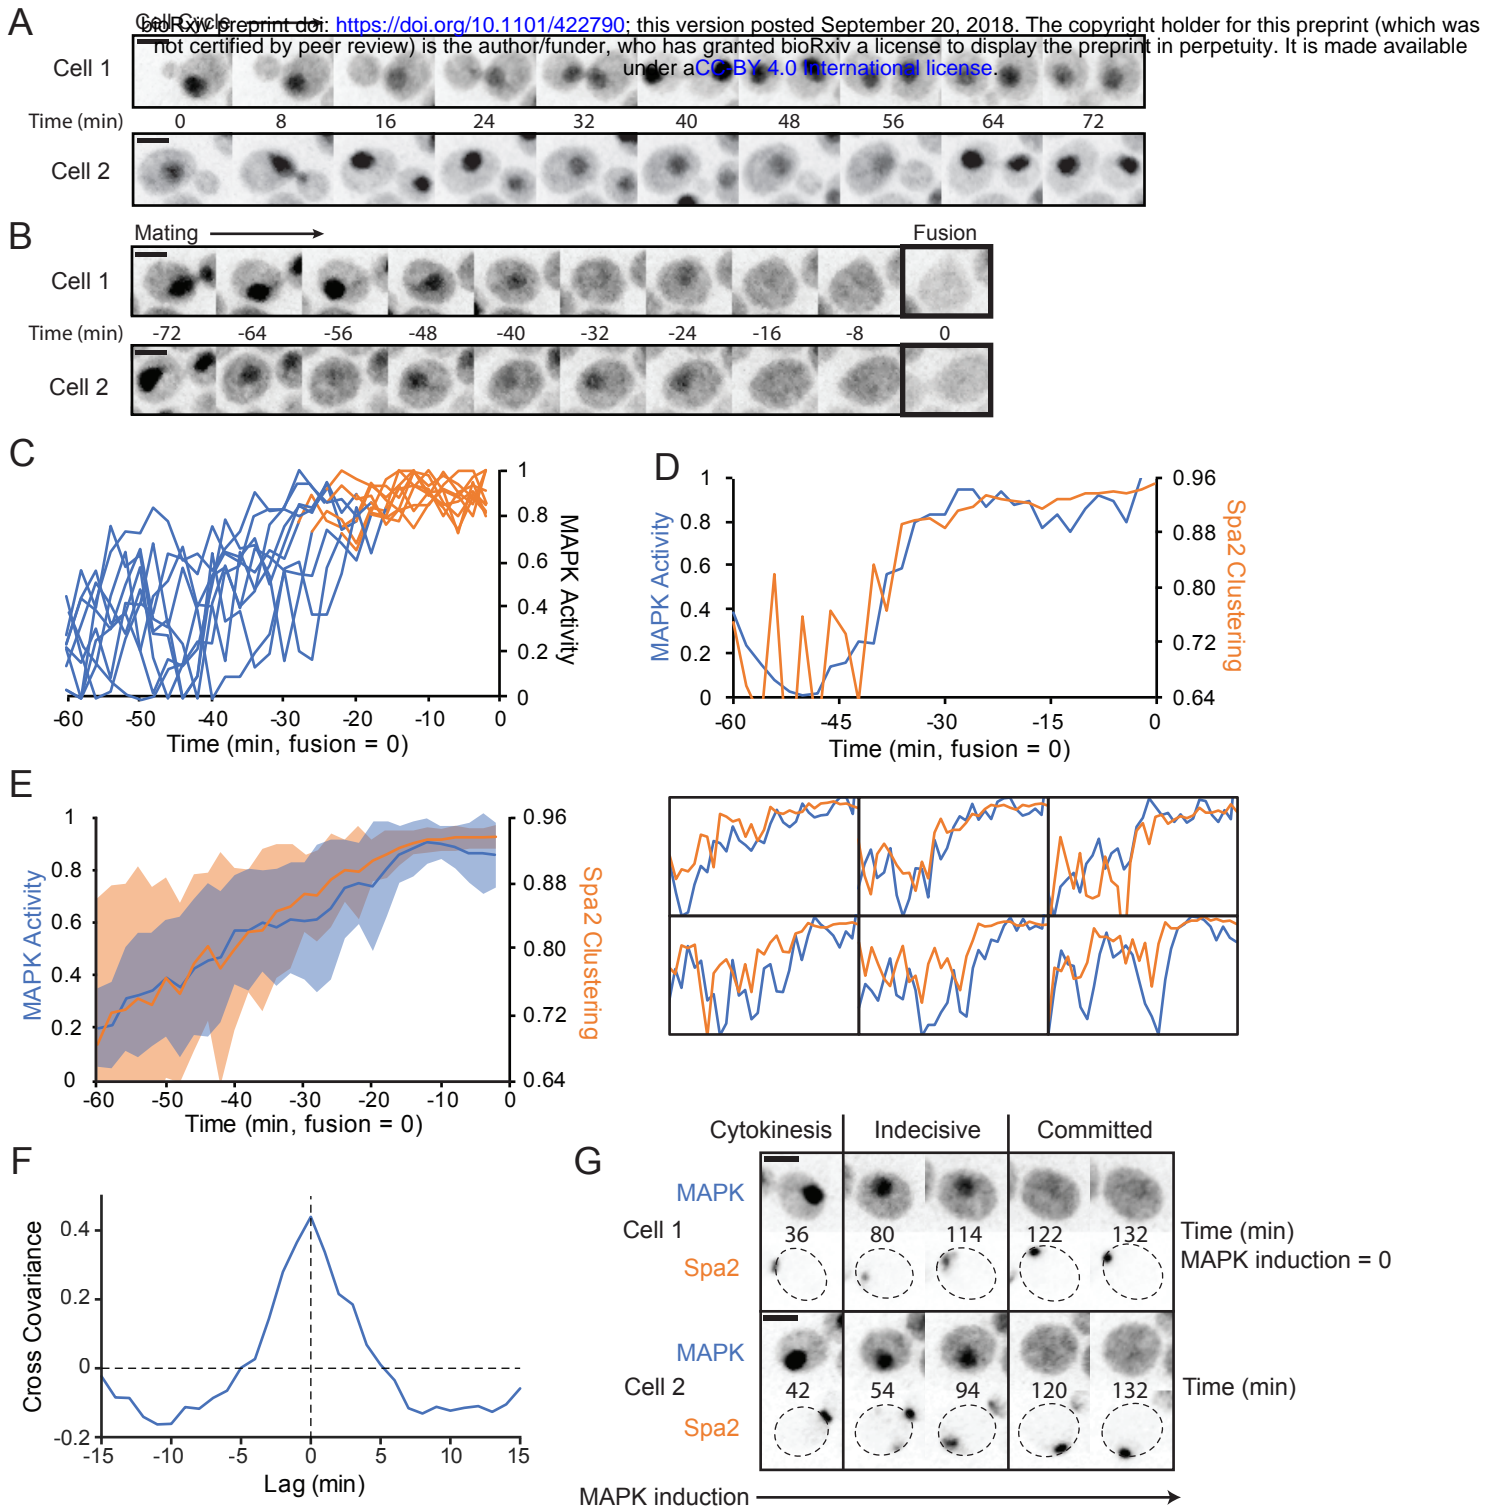

**Figure 3. Commitment coincides with an increase in MAPK activity.** (A) Localization of MAPK activity sensor varies through the cell cycle. Inverted maximum z-projection images of the sensor Ste7<sub>1-33</sub>-NLS-NLS-mCherry in two representative vegetatively growing cells. (B) The sensor is exported from the nucleus in response to MAPK activation. MATa cells harboring Ste7<sub>1-33</sub>-NLS-NLS-mCherry were mixed with MATα cells and imaged as in (A). Two representative mating cells illustrated from birth to fusion (0 min = fusion). (C) MAPK activity calculated from sensor distribution (see methods) in the 60 min prior to fusion. The transition from the indecisive phase (blue) to the committed phase (orange) was determined from a Spa2-GFP probe in the same cells. (D) Top: MAPK activity (blue, as in C) and Spa2 clustering (orange, as in Fig. 1F) in a representative mating cell. Bottom: six other cells plotted as above. (E) Average MAPK activity (blue) and Spa2 clustering (orange) during the 60 min prior to fusion (n=23 cells). Shaded regions represent standard deviations. (F) Cross-covariance of MAPK activity and Spa2 clustering during the indecisive phase (window from 60 minutes before fusion to 30 minutes before fusion) in mating cells (n=23 cells). Lag represents the time by which the Spa2 clustering data was shifted forward in time relative to the MAPK activity data. 1 = perfect cross-covariance (i.e. auto-covariance = 1 when lag = 0) (G) Cells harboring P<sub>GAL1</sub>-Ste5-CTM allow MAPK induction by β-estradiol without pheromone treatment. The MAPK sensor Ste7<sub>1-33</sub>-NLS-NLS-mCherry and Spa2-GFP were imaged following β-estradiol treatment and inverted maximum z-projection images of selected time points showing Spa2 neck localization during cytokinesis, the indecisive behavior upon intermediate MAPK activation, and committed behavior following high MAPK activation in two representative cells. Scale bar, 3 μm. Strains: DLY22259 (A-F), DLY22764 (G).

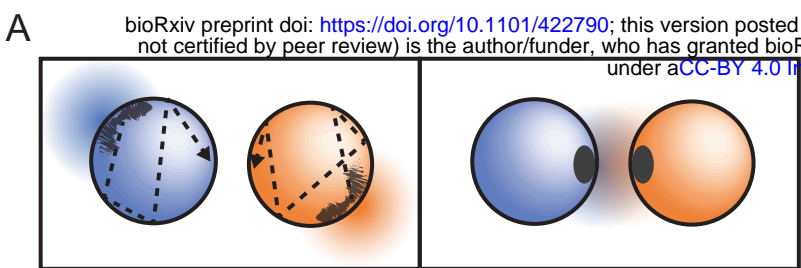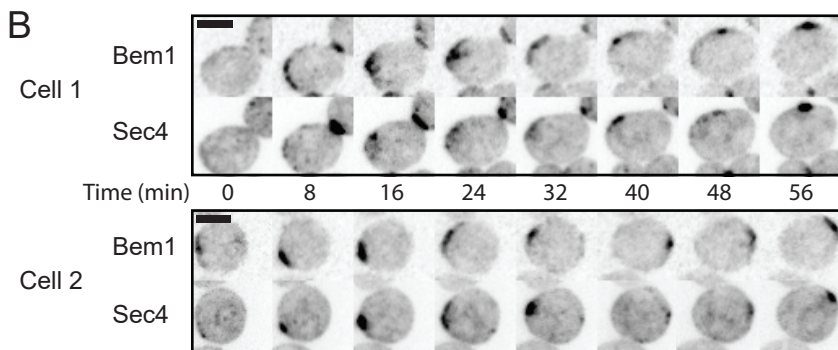

**Figure 4. Secretory vesicles colocalize with the polarity cluster. (A)** Hypothesized pheromone secretion during indecisive (left) and committed (right) phases. When clusters are adjacent, local pheromone concentration would be higher, triggering commitment. **(B)** MAT $\alpha$  cells harboring Bem1-tdTomato and the secretory vesicle marker GFP-Sec4 were mixed with MAT $\alpha$  cells and imaged as in Fig. 1A. Inverted maximum z-projection images at 8 min intervals show colocalization of Bem1 and Sec4 during the indecisive phase. Scale bar, 3  $\mu$ m. Strain: DLY13771.

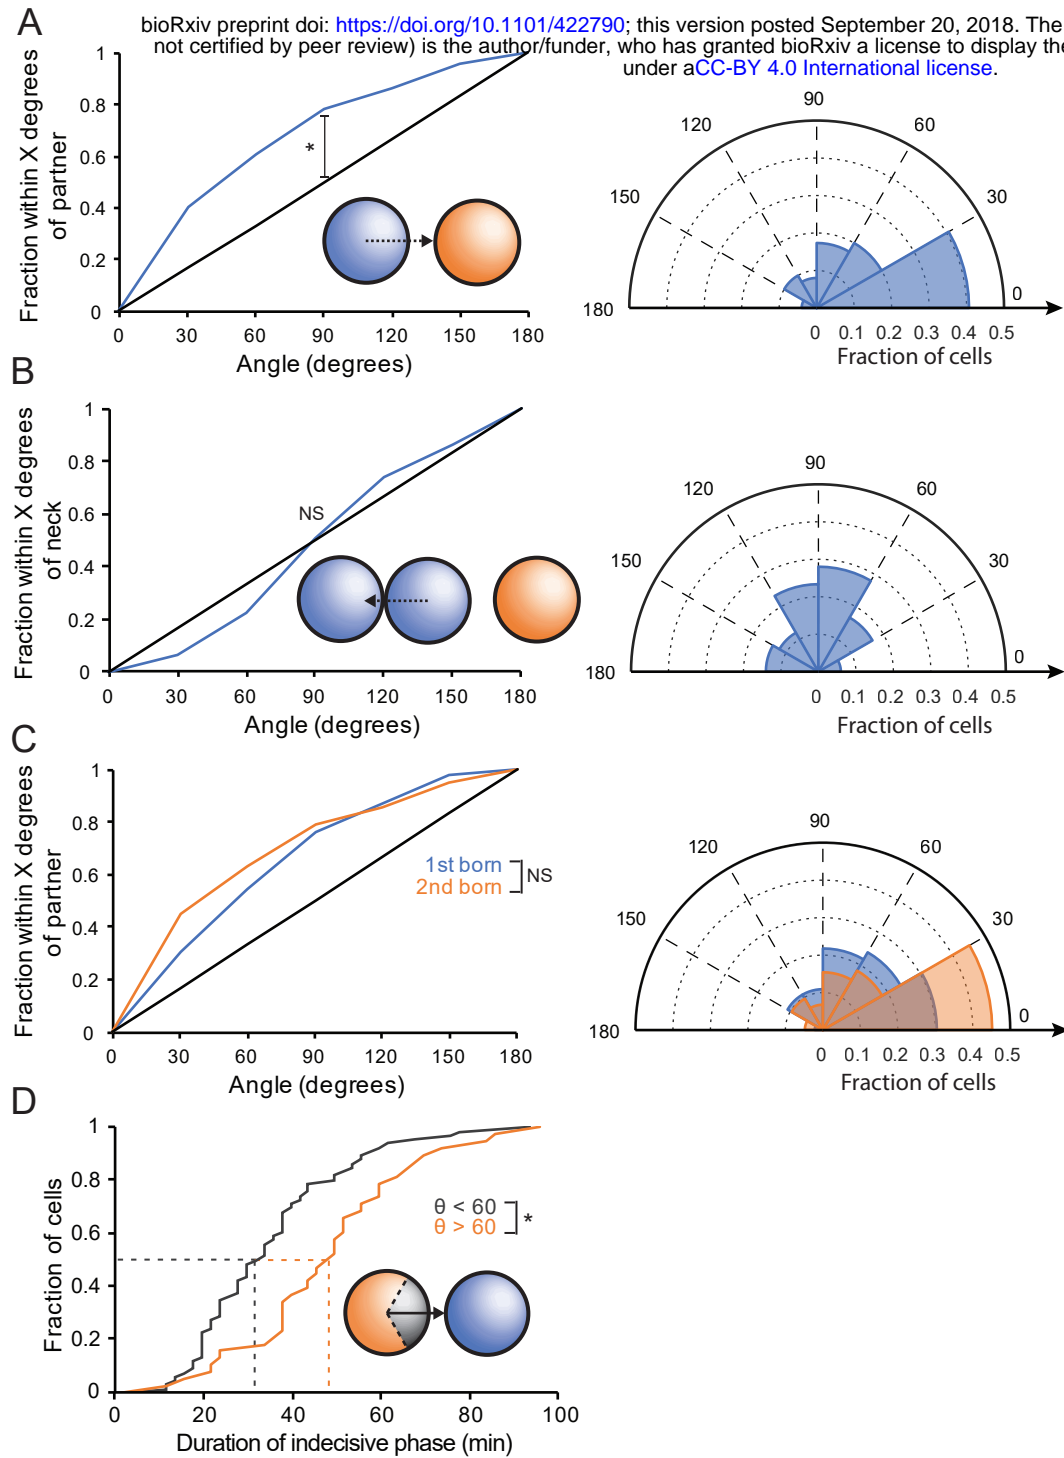

**Figure 5. Non-random initial clustering of polarity factors. (A)** Orientation with respect to partner. Left: cumulative distribution of initial Bem1 cluster location (angle) relative to the mating partner (n=150). 0 degrees = cluster formation directly adjacent to eventual mating partner, as shown in inset. Black line: hypothetical random distribution (\* KS test, p < 0.05). Right: polar histogram displaying the same data. **(B)** Orientation with respect to neck. Left: cumulative distribution of initial cluster location relative to the site of cytokinesis (n=150, KS test, not significant). Right: polar histogram displaying the same data. **(C)** Left: cumulative distribution of initial cluster location relative to the mating partner, plotted separately for first-born (blue, n=46) and second born (orange, n=104) cells (two sample KS test, not significant). Right: polar histogram of the same data. **(D)** Cumulative distribution of the duration of the indecisive phase in second-born cells, plotted separately for cells in which the initial cluster formed within 60° of the mating partner ( $\theta < 60^\circ$ , orange, n=66), and cells in which the initial cluster formed greater than 60° from the partner ( $\theta > 60^\circ$ , blue, n=38)(\* two sample KS test, p < 0.05). Inset: diagram displaying the two groups of cells. Strain: DLY12943, DLY7593.



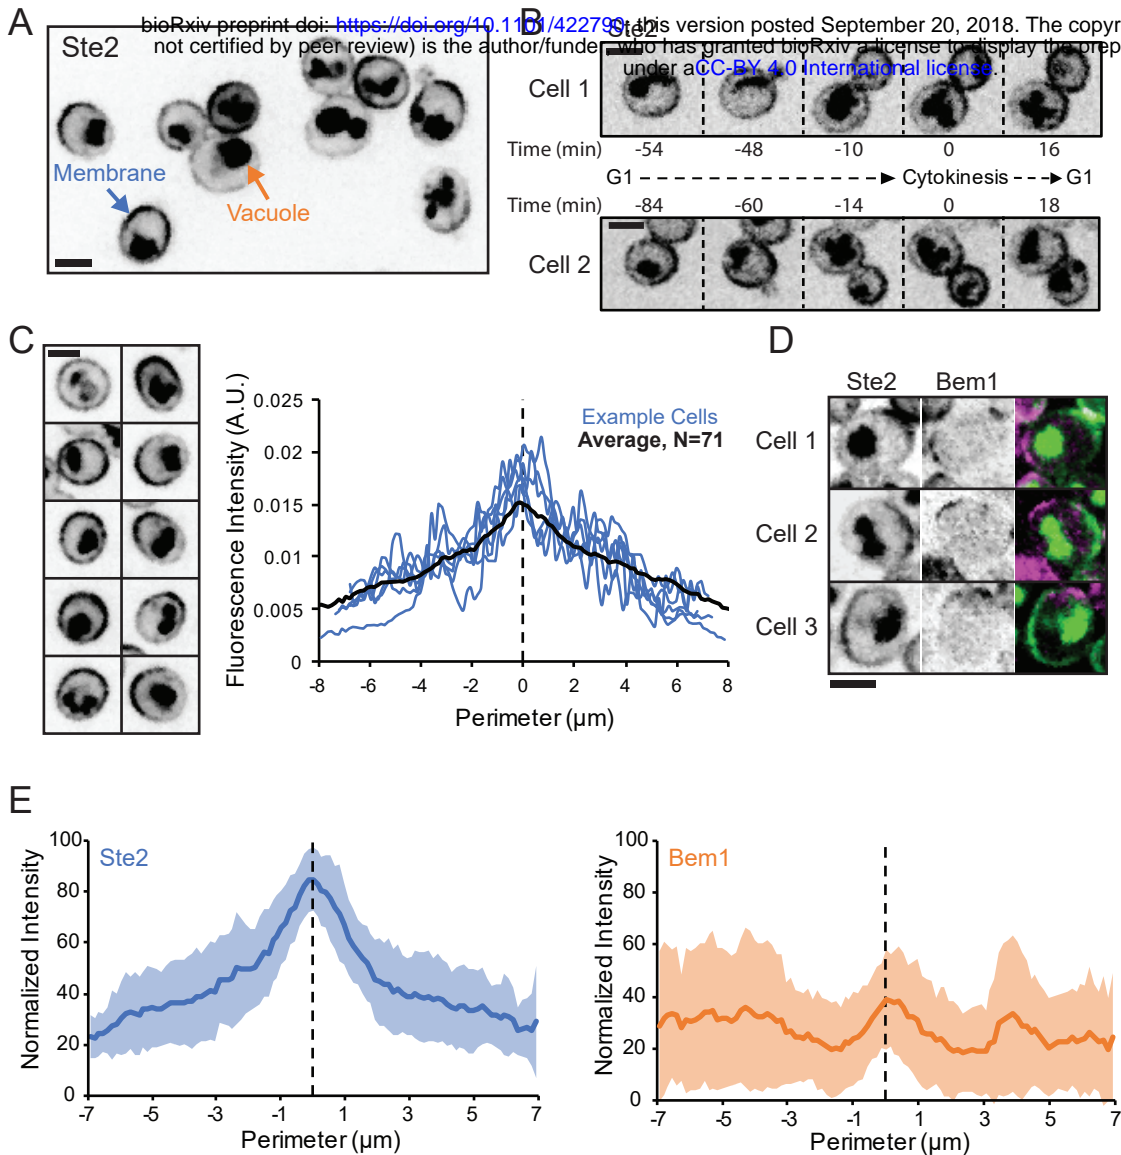

**Figure 6. Pheromone receptor distribution prior to pheromone exposure.** (A) Single-plane inverted image of vegetatively growing cells expressing Ste2-sfGFP. Membrane signal (blue arrow) is Ste2-sfGFP, but vacuole signal (orange arrow) is probably sfGFP cleaved from Ste2-sfGFP after internalization. (B) Time series of two representative cells displaying the Ste2 distribution through the cell cycle. (C) Left: Representative G1 cells displaying Ste2 distributions ranging from almost uniform (top left) to very asymmetric (bottom right). Right: quantification of Ste2-sfGFP membrane distribution in G1 cells. Individual linescans (examples in blue) were normalized to have the same total fluorescence and centered based on the maximum of a smoothed spline fit. Black line, average (n=71). (D) Initial Bem1 clusters sometimes form in areas depleted of receptor. Single-plane Ste2-sfGFP images (left), maximum projection Bem1-tdTomato images (middle), and both overlaid (right, Bem1 = magenta, Ste2 = green, both = white) from three example cells at the time of initial clustering. (E) Bem1 initial cluster formation is random with respect to Ste2 distribution. Left: averaged Ste2-sfGFP distribution (shaded region, standard deviation) at the time of initial clustering (n=33). Right: averaged Bem1-tdTomato distribution at the time of initial clustering, centered on the peak of the Ste2-sfGFP distribution (n=33). Bem1 linescans acquired from maximum projection images of the same cells. Scale bar, 3  $\mu$ m. Strains: DLY20713 (A-C), DLY22243 (D, E).

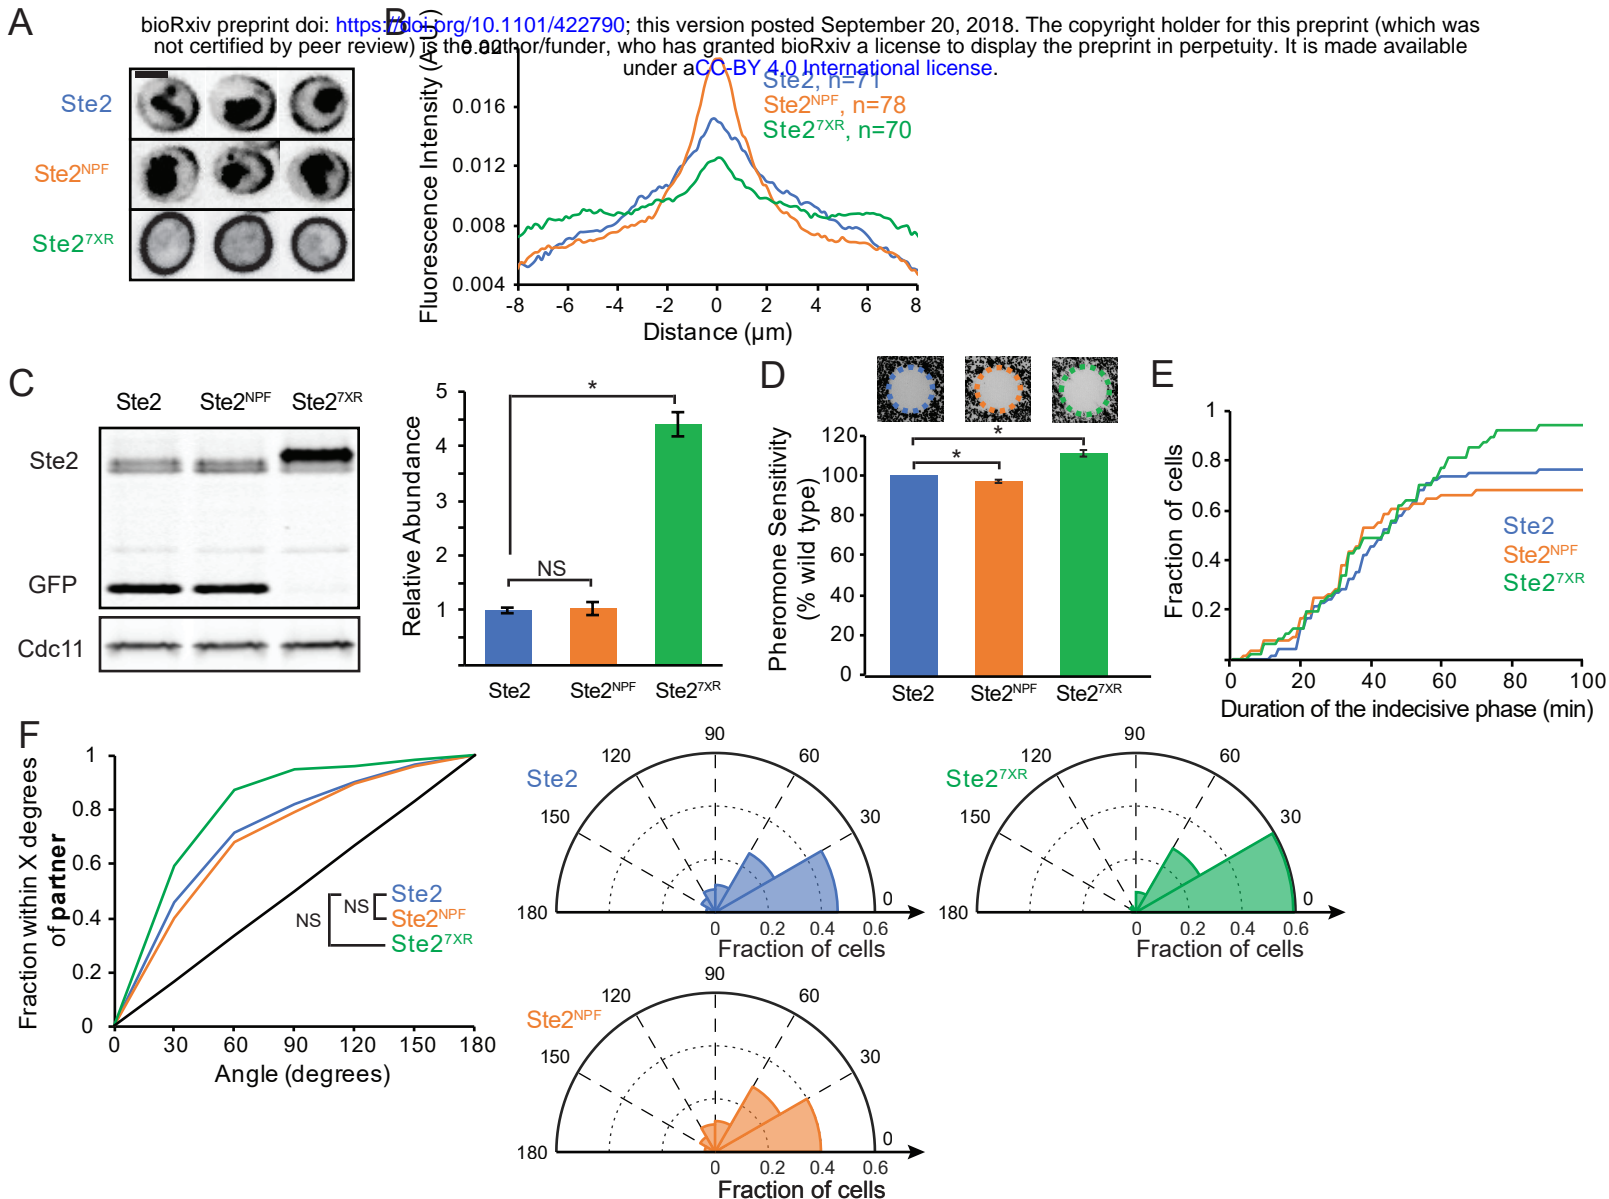

**Figure 7. Effect of receptor distribution on the accuracy of initial clustering.** (A) Single-plane inverted images of Ste2-sfGFP (top), Ste2<sup>NPF</sup>-sfGFP (middle), and Ste2<sup>7XR-GPAAD</sup>-sfGFP (bottom) in representative G1 cells. Ste2<sup>7XR-GPAAD</sup>-sfGFP displayed stronger fluorescence. As a result, the brightness and contrast of the Ste2<sup>7XR-GPAAD</sup>-sfGFP images have been scaled differently for clear visibility. (B) Average Ste2 membrane distribution, quantified as in Fig. 6C, in G1 cells with Ste2-sfGFP (blue), Ste2<sup>NPF</sup>-sfGFP (orange), and Ste2<sup>7XR-GPAAD</sup>-sfGFP (green). (C) Ste2-sfGFP abundance. Left: representative Western blot. -GFP antibodies label two bands – full-length Ste2-sfGFP and vacuolar sfGFP (note absence of vacuole signal for Ste2<sup>7XR-GPAAD</sup>). Right: quantification of full-length Ste2 abundance (n=3 biological replicates, normalized to the average abundance of wild-type Ste2). (D) Halo assay for phormone sensitivity of cells with wild-type Ste2 (blue), Ste2<sup>NPF</sup> (orange), and Ste2<sup>7XR-GPAAD</sup> (green). Top: images of representative halos. Bottom: quantification of halo diameter (n=9, 3 technical replicates at 3 phormone concentrations, normalized to the average wild-type halo diameter; \* t test, p < 0.05). (E) Cumulative distribution of the duration of the indecisive phase for MAT $\alpha$  cells that were born immediately adjacent to a MAT $\alpha$  partner in G1, and either budded or mated by the end of the movie. Cells harboring Ste2 (blue, n=71), Ste2<sup>NPF</sup> (orange, n=53), or Ste2<sup>7XR-GPAAD</sup> (green, n=47). (F) Left: Cumulative distribution of initial Bem1 cluster orientation relative to the nearest potential mating partner for MAT $\alpha$  cells born immediately adjacent to a MAT $\alpha$  G1 cell. Cells with wild-type Ste2 (blue, n=117), Ste2<sup>NPF</sup> (orange, n=78, not significant), or Ste2<sup>7XR-GPAAD</sup> (green, n=79, not significant). Right: polar histograms of the same data. Scale bar, 3  $\mu$ m. Strains: DLY20713, DLY20715, DLY21705 (A, B), DLY21203, DLY21206, DLY21704 (C), DLY22321, DLY21301, DLY21295 (D), DLY12943, DLY22058, DLY22397 (E, F).

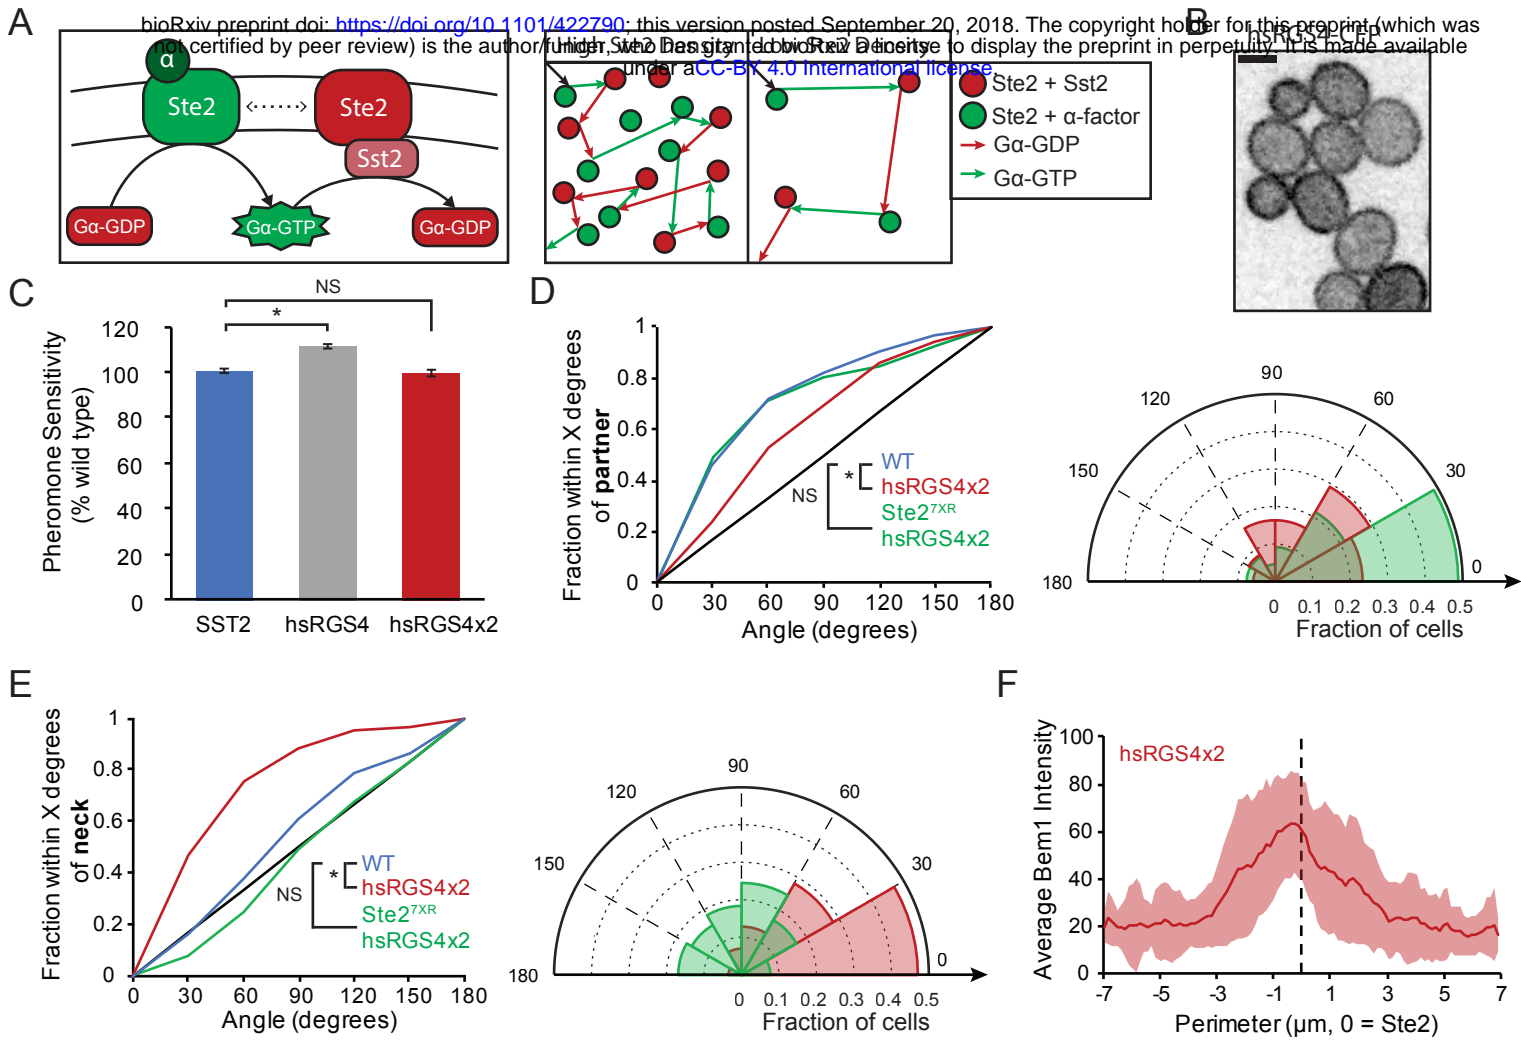

**Figure 8. Ratiometric sensing allows cells to orient towards partners despite uneven receptor density.** (A) Proposed ratiometric

pheromone sensing mechanism. Left:  $G\alpha$  is activated by pheromone-bound receptor (Ste2 +  $\alpha$ -factor), and inactivated by the RGS protein Sst2. Sst2 associates with inactive Ste2. When Ste2 is activated by  $\alpha$ -factor, Sst2 dissociates from Ste2. The instantaneous activation state of  $G\alpha$  is determined by the state of the receptor with which it last interacted. Right:  $G\alpha$  switches between active (green arrows) and inactive (red arrows) states when it interacts with active (green circles) and inactive (red circles) receptors. The fraction of the local  $G\alpha$  that is active reflects the ratio of active to inactive receptors, regardless of receptor density. This means differences in pheromone level at different points on the cell surface can be compared even if there are differences in receptor density. (B) hsRGS4 is distributed uniformly on the membrane. Single-plane inverted image of hsRGS4-CFP. (C) Pheromone sensitivity measured via halo assay in wild-type cells (blue), and cells in which Sst2 has been replaced by one copy (gray, hsRGS4, \* t test,  $p < 0.05$ ) or two copies (red, hsRGS4x2, not significant) of hsRGS4 ( $n=9$ , 3 technical replicates at 3 pheromone concentrations, normalized to the average wild type halo diameter). (D) Left: Cumulative distribution of the location of initial Bem1 cluster orientation relative to the nearest potential mating partner in wild type cells (blue,  $n=117$ ), hsRGS4x2 cells (red,  $n=85$ , \* two sample KS test,  $p < 0.05$ ), and hsRGS4x2 cells harboring Ste2<sup>7XR-GPAAD</sup> (uniform receptor, green,  $n=65$ , not significant). Right: polar histogram of the same data for hsRGS4 strains. (E) Left: Cumulative distribution of the location of initial Bem1 cluster formation relative to the site of cytokinesis in wild type cells (blue,  $n=117$ ), hsRGS4x2 cells (red,  $n=85$ , \* two sample KS test,  $p < 0.05$ ), and hsRGS4x2 cells harboring Ste2<sup>7XR-GPAAD</sup> (uniform receptor, green,  $n=65$ , not significant). Right: The same data represented as a polar histogram (WT not plotted). (F) Bem initial cluster location is biased by Ste2 distribution in hsRGS4x2 cells. Average Bem1 distribution at the time of initial clustering relative to Ste2 maximum, plotted as in Fig. 6E ( $n=33$ ). Scale bar, 3  $\mu$ m. Strains: DLY22318 (B, C), DLY22321, DLY22520 (C-F), DLY12943, DLY22606 (D-F).

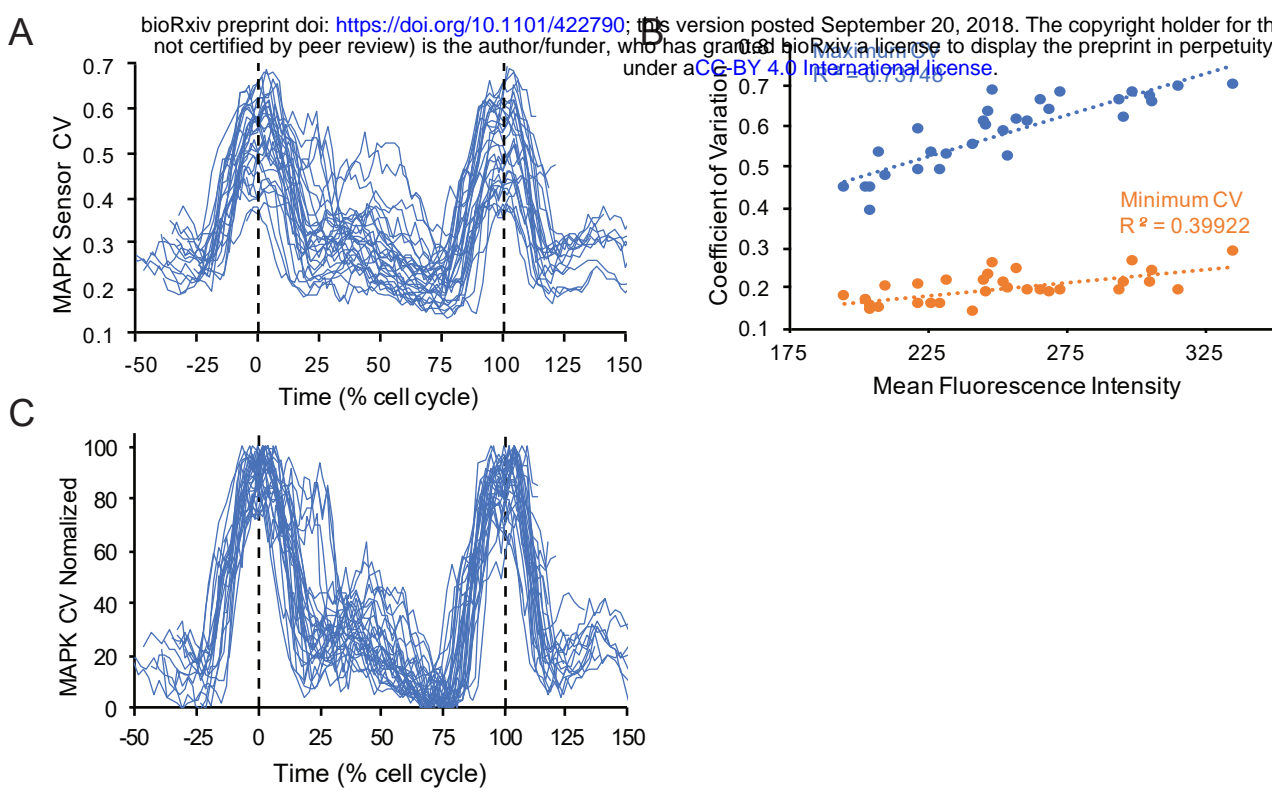

**Figure S1. MAPK sensor normalization.** Cells harboring Ste7<sub>1-33</sub>-NLS-NLS-mCherry were imaged for 150 min with 2 min resolution. **(A)** Coefficient of variation (CV) of Ste7<sub>1-33</sub>-NLS-NLS-mCherry, measured from maximum projection images in a region of interest encompassing the full cell. Time was normalized to “% cell cycle,” with the first cytokinesis for each cell aligned at 0, and the second cytokinesis aligned at 100. **(B)** Maximum (blue) and minimum (orange) CV vs mean fluorescence intensity for each cell in (A). Mean fluorescence intensity was measured in the same region of interest as CV, and averaged across all time points for each cell. **(C)** Normalized CV, plotted as in (A). CV was normalized to 0 and 1 at the minimum and maximum CV for each cell. Strains: DLY22259 (A-C).

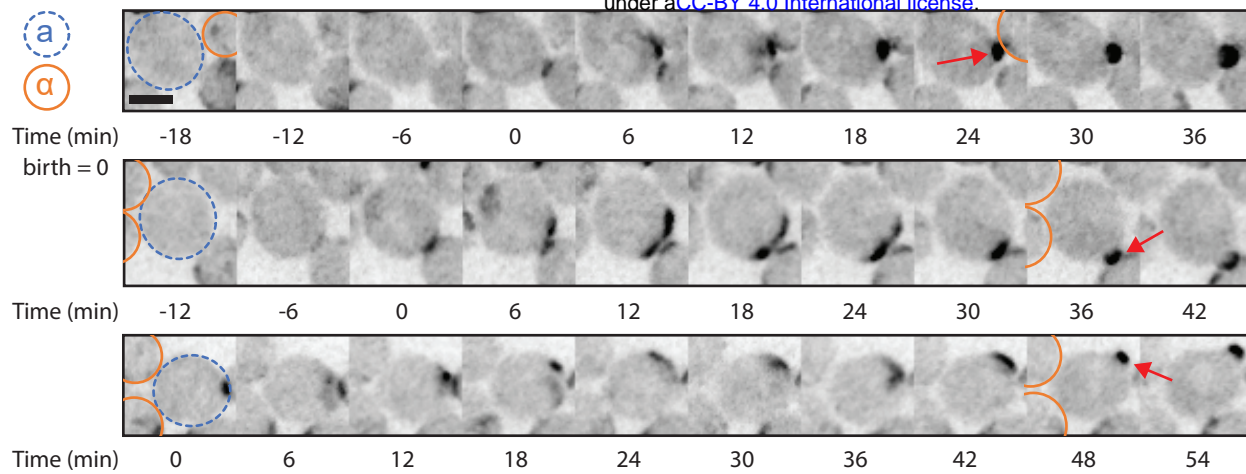

**Figure S2. Bem1 polarization in  $Ste2^{NPF}$  cells that failed to mate.** Cells with faster pheromone receptor endocytosis sometimes bud instead of mating with available partners. MATa cells harboring Bem1-GFP and  $Ste2^{NPF}$  were mixed with MAT $\alpha$  cells harboring Bem1-tdTomato and imaged immediately. **(A)** Time series of maximum projection images of Bem1-GFP polarization in three MATa cells (blue circles) harboring  $Ste2^{NPF}$  that failed to mate with adjacent G1 MAT $\alpha$  cells (orange circles). Red arrows indicate bud emergence. 60 min, 6 min interval, birth = 0 min, scale bar, 3  $\mu$ m. Strains: DLY22058.
